# Supplementary material for: Cytosporones with Anti-Inflammatory Activities from the Mangrove Endophytic Fungus Phomopsis sp. QYM-13
Source: MDPI journal article supplement (doi:10.3390/md21120631), 2023-12-07
Supplement: s1 [file s1]

**Cytosporones with anti-inflammatory activities from the mangrove endophytic fungus *Phomopsis* sp. QYM-13**

Guisheng Wang<sup>1,2†</sup>, Yilin Yuan<sup>3†</sup>, Zhaokun Li<sup>1</sup>, Zhigang She<sup>2\*</sup> and Yan Chen<sup>1\*</sup>

<sup>1</sup>School of Pharmacy, Anhui Medical University, Hefei, 230032, China

<sup>2</sup>School of Chemistry, Sun Yat-sen University, Guangzhou, 510275, China

<sup>3</sup>National R&D Center for Edible Fungus Processing Technology, Henan University, Kaifeng 475004, China

<sup>†</sup>These authors have contributed equally to this work

\*Corresponding author

Email address: [cychemistry@163.com](mailto:cychemistry@163.com) (Y. Chen); [cesshzhg@mail.sysu.edu.cn](mailto:cesshzhg@mail.sysu.edu.cn) (Z. She).

### Supporting Information Contents:

**Figure. S1**  $^1\text{H}$  NMR spectrum of compound **1** (500 MHz, MeOD- $d_4$ ).

**Figure. S2**  $^{13}\text{C}$  NMR spectrum of compound **1** (125 MHz, MeOD- $d_4$ ).

**Figure. S3** HSQC spectrum of compound **1**.

**Figure. S4**  $^1\text{H}$ - $^1\text{H}$  COSY spectrum of compound **1**.

**Figure. S5** HMBC spectrum of compound **1**.

**Figure. S6** HRESIMS spectrum of compound **1**.

**Figure. S7**  $^1\text{H}$  NMR spectrum of compound **2** (500 MHz, MeOD- $d_4$ ).

**Figure. S8**  $^{13}\text{C}$  NMR spectrum of compound **2** (125 MHz, MeOD- $d_4$ ).

**Figure. S9** HSQC spectrum of compound **2**.

**Figure. S10**  $^1\text{H}$ - $^1\text{H}$  COSY spectrum of compound **2**.

**Figure. S11** HMBC spectrum of compound **2**.

**Figure. S12** HRESIMS spectrum of compound **2**.

**Figure. S13**  $^1\text{H}$  NMR spectrum of compound **3** (500 MHz, MeOD- $d_4$ ).

**Figure. S14**  $^{13}\text{C}$  NMR spectrum of compound **3** (125 MHz, MeOD- $d_4$ ).

**Figure. S15** HSQC spectrum of compound **3**.

**Figure. S16**  $^1\text{H}$ - $^1\text{H}$  COSY spectrum of compound **3**.

**Figure. S17** HMBC spectrum of compound **3**.

**Figure. S18** HRESIMS spectrum of compound **3**.

**Figure. S19**  $^1\text{H}$  NMR spectrum of compound **4** (500 MHz, MeOD- $d_4$ ).

**Figure. S20**  $^{13}\text{C}$  NMR spectrum of compound **4** (125 MHz, MeOD- $d_4$ ).

**Figure. S21** HSQC spectrum of compound **4**.

**Figure. S22**  $^1\text{H}$ - $^1\text{H}$  COSY spectrum of compound **4**.

**Figure. S23** HMBC spectrum of compound **4**.

**Figure. S24** HRESIMS spectrum of compound **4**.

**Figure. S25**  $^1\text{H}$  NMR spectrum of compound **5** (500 MHz, MeOD- $d_4$ ).

**Figure. S26**  $^{13}\text{C}$  NMR spectrum of compound **5** (125 MHz, MeOD- $d_4$ ).

**Figure. S27** HSQC spectrum of compound **5**.

**Figure. S28**  $^1\text{H}$ - $^1\text{H}$  COSY spectrum of compound **5**.

**Figure. S29** HMBC spectrum of compound **5**.

**Figure. S30** HRESIMS spectrum of compound **5**.

**Figure. S31**  $^1\text{H}$  NMR spectrum of compound **13** (500 MHz,  $\text{DMSO-}d_6$ ).

**Figure. S32**  $^{13}\text{C}$  NMR spectrum of compound **13** (125 MHz,  $\text{DMSO-}d_6$ ).

**Figure. S33** HSQC spectrum of compound **13**.

**Figure. S34**  $^1\text{H-}^1\text{H}$  COSY spectrum of compound **13**.

**Figure. S35** HMBC spectrum of compound **13**.

**Figure. S36** HRESIMS spectrum of compound **13**.

**Figure. S37**  $^1\text{H}$  NMR spectrum of compound **14** (500 MHz,  $\text{DMSO-}d_6$ ).

**Figure. S38**  $^{13}\text{C}$  NMR spectrum of compound **14** (125 MHz,  $\text{DMSO-}d_6$ ).

**Figure. S39** HSQC spectrum of compound **14**.

**Figure. S40**  $^1\text{H-}^1\text{H}$  COSY spectrum of compound **14**.

**Figure. S41** HMBC spectrum of compound **14**.

**Figure. S42** NOESY spectrum of compound **14**.

**Figure. S43** HRESIMS spectrum of compound **14**.

**Figure. S44**  $^1\text{H}$  NMR spectrum of compound **15** (500 MHz,  $\text{DMSO-}d_6$ ).

**Figure. S45**  $^{13}\text{C}$  NMR spectrum of compound **15** (125 MHz,  $\text{DMSO-}d_6$ ).

**Figure. S46** HSQC spectrum of compound **15**.

**Figure. S47**  $^1\text{H-}^1\text{H}$  COSY spectrum of compound **15**.

**Figure. S48** HMBC spectrum of compound **15**.

**Figure. S49** NOESY spectrum of compound **15**.

**Figure. S50** HRESIMS spectrum of compound **15**.

**Table S1.** The DP4+ evaluation of compound **14**.

**Table S2.** The binding energy of compounds **1-13** with numerous inflammatory targets (kcal/mol).

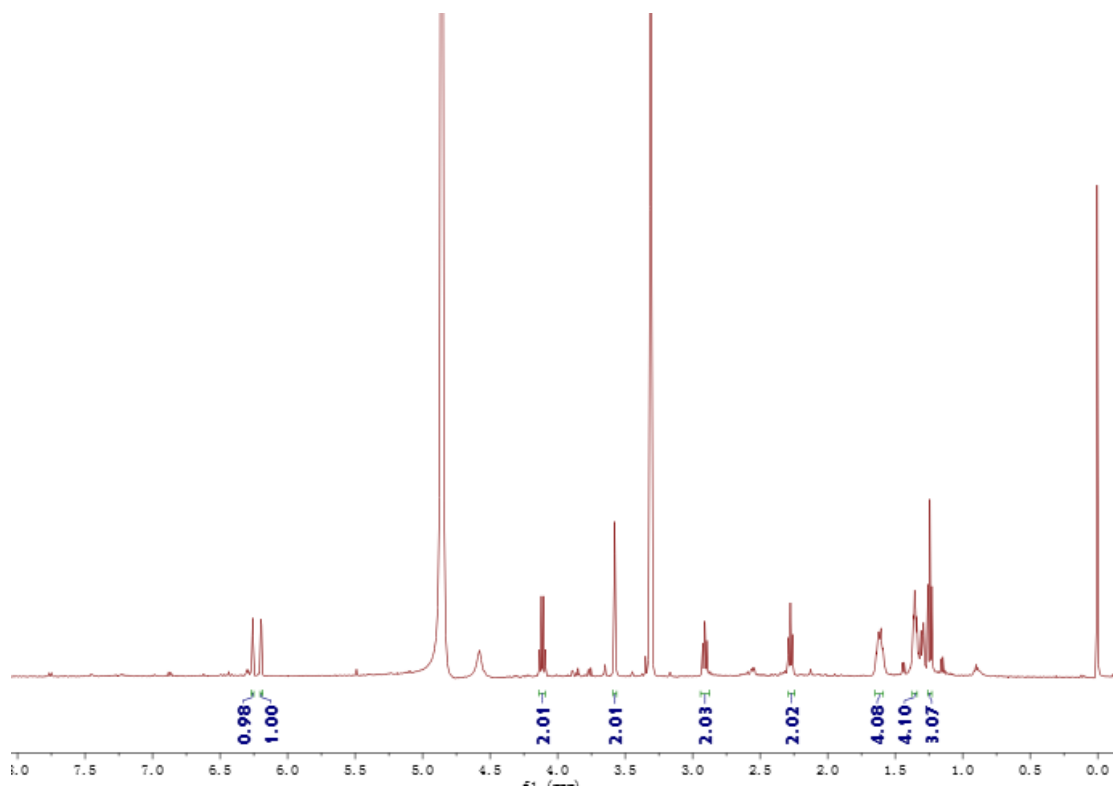

**Figure. S1** <sup>1</sup>H NMR spectrum of compound **1** (500 MHz, MeOD-*d*<sub>4</sub>).

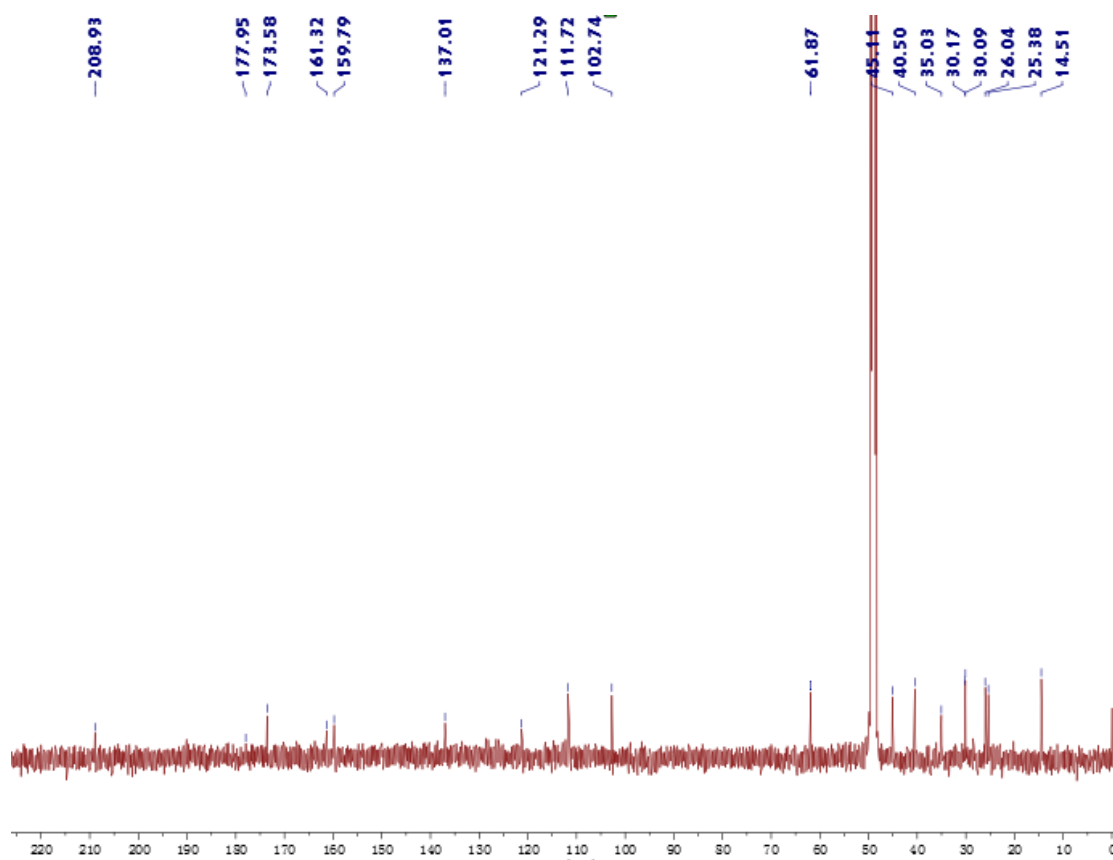

**Figure. S2** <sup>13</sup>C NMR spectrum of compound **1** (125 MHz, MeOD-*d*<sub>4</sub>).

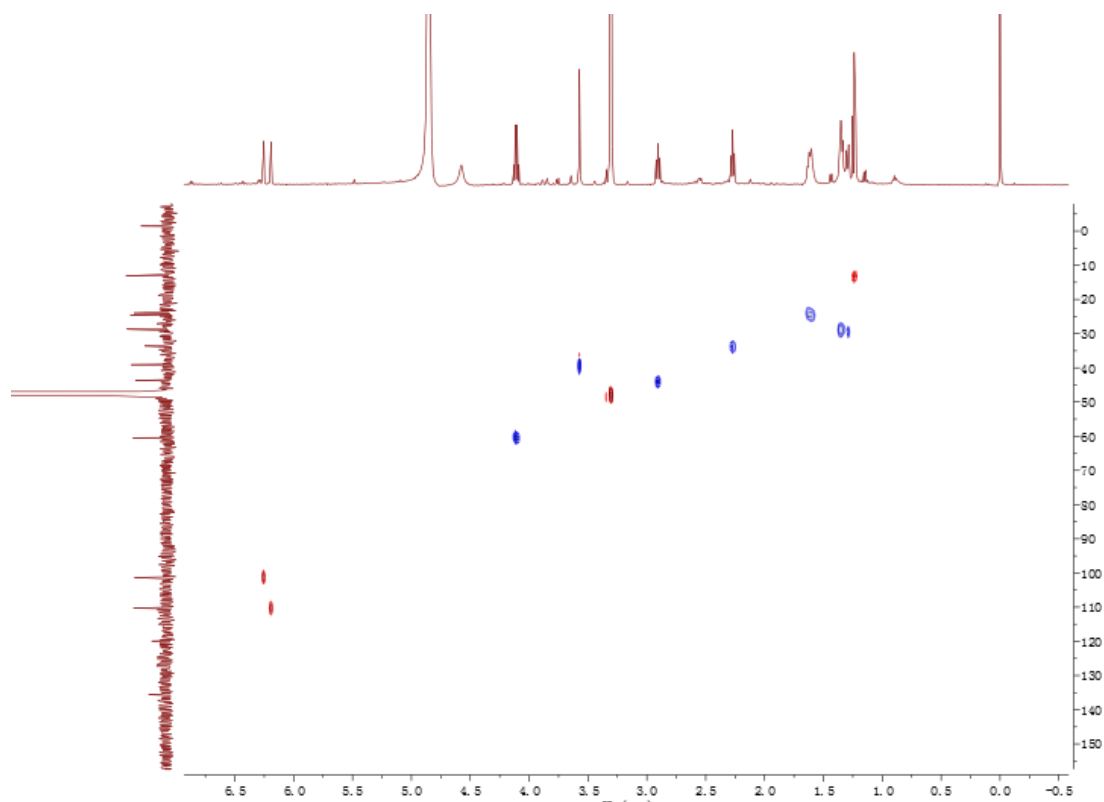

**Figure. S3** HSQC spectrum of compound **1**.

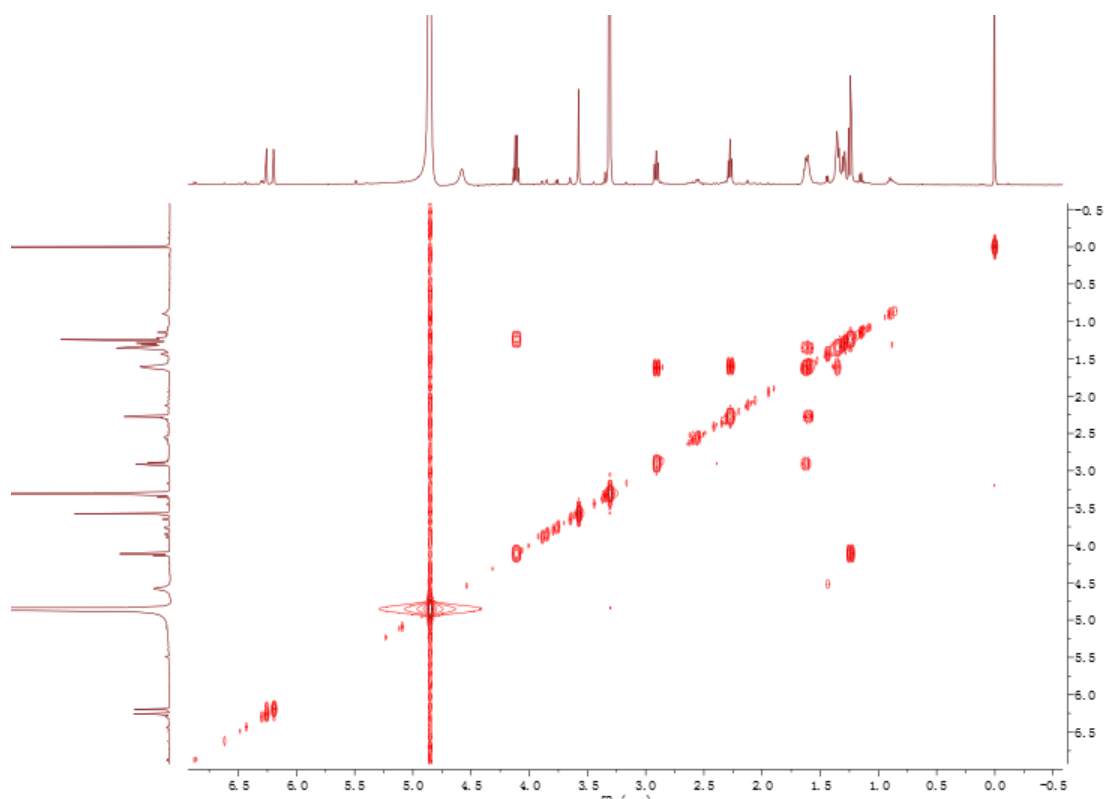

**Figure. S4**  $^1\text{H}$ - $^1\text{H}$  COSY spectrum of compound **1**.

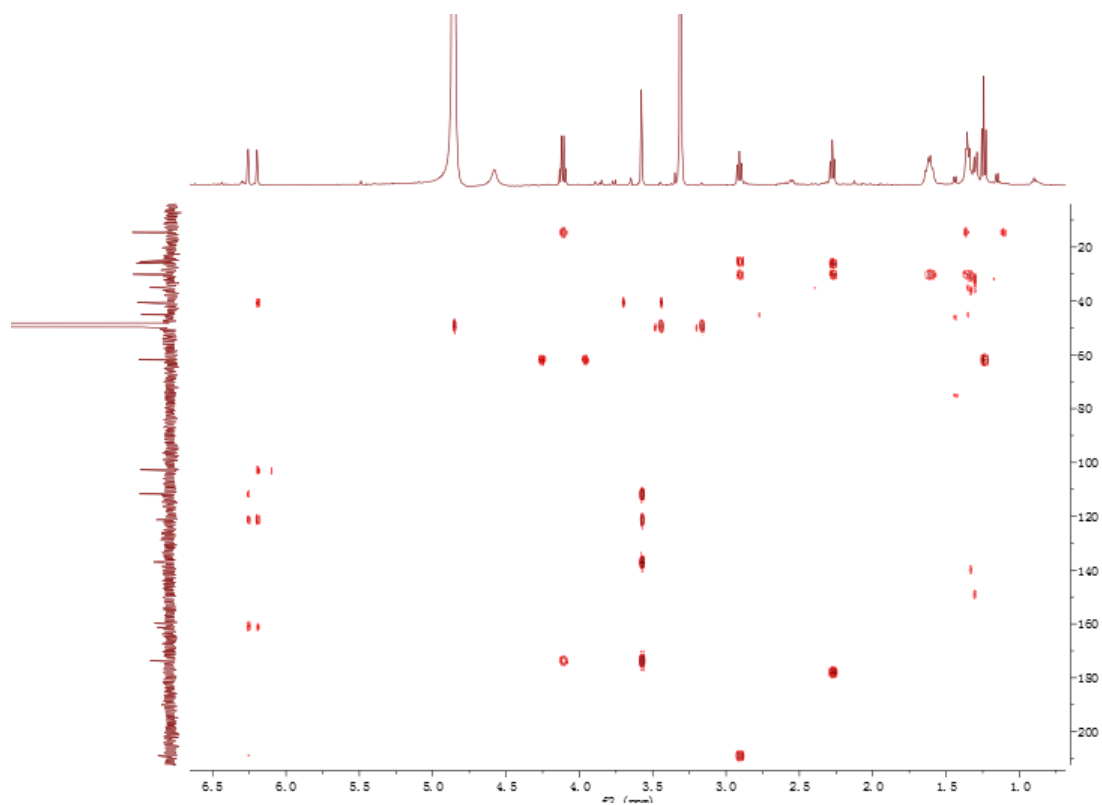

**Figure. S5** HMBC spectrum of compound **1**.

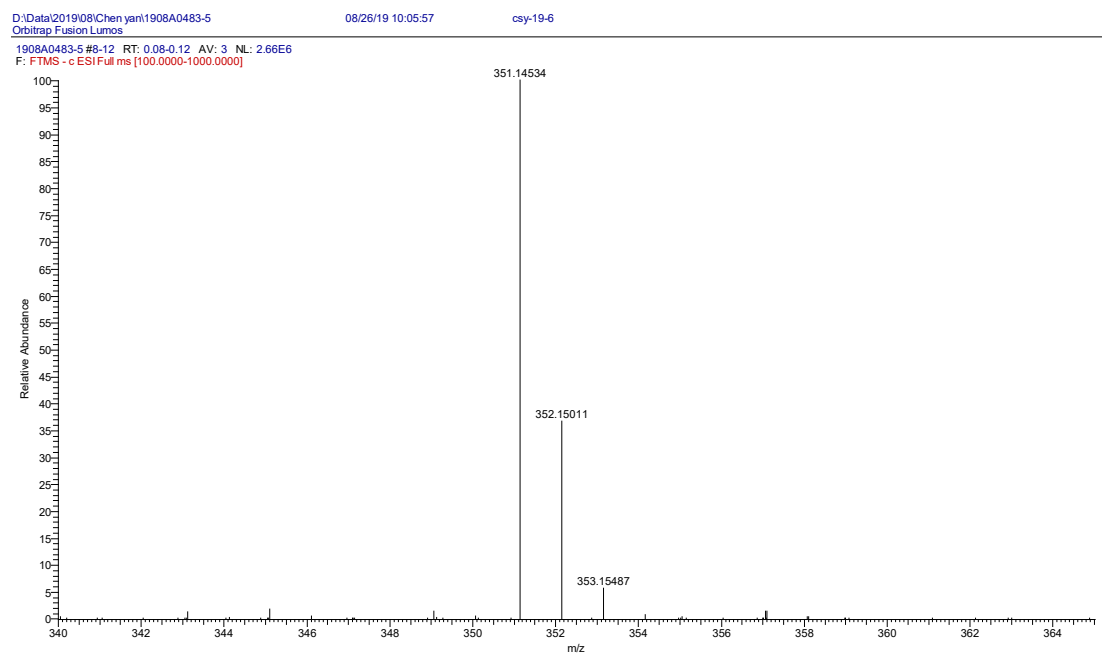

**Figure. S6** HRESIMS spectrum of compound **1**.

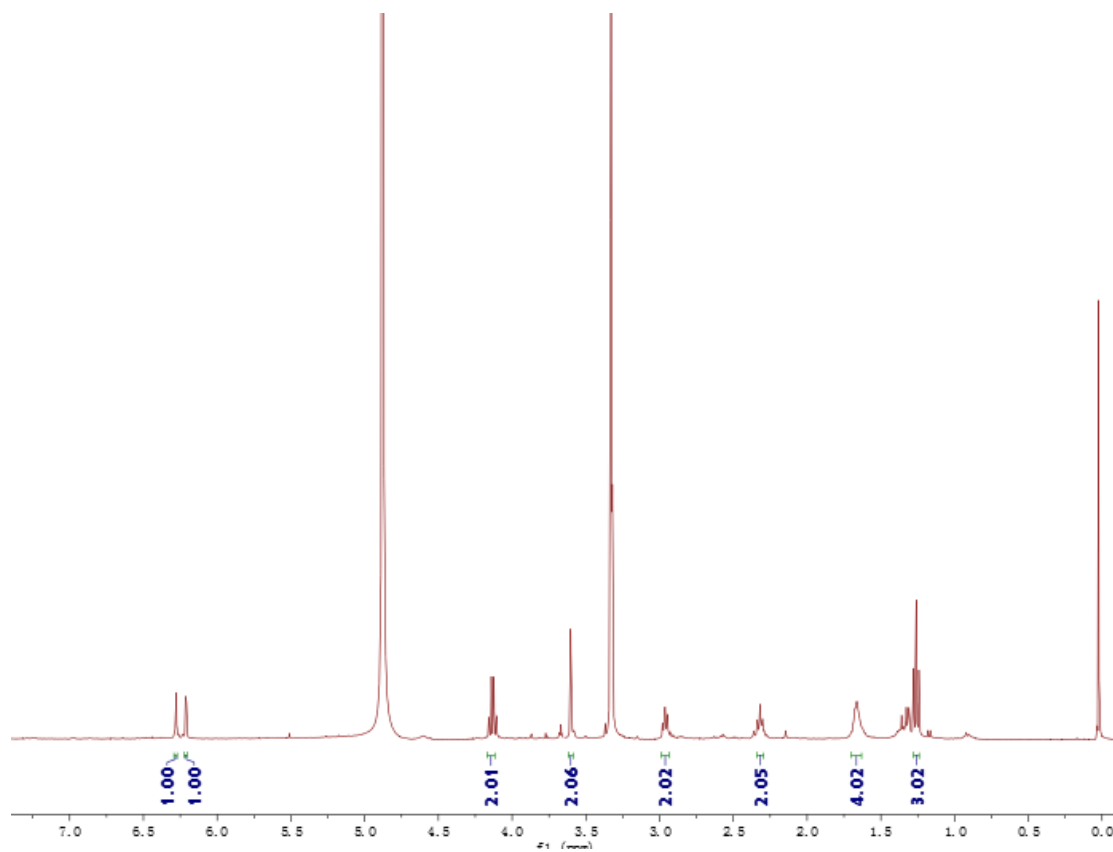

**Figure. S7**  $^1\text{H}$  NMR spectrum of compound **2** (500 MHz, MeOD- $d_4$ ).

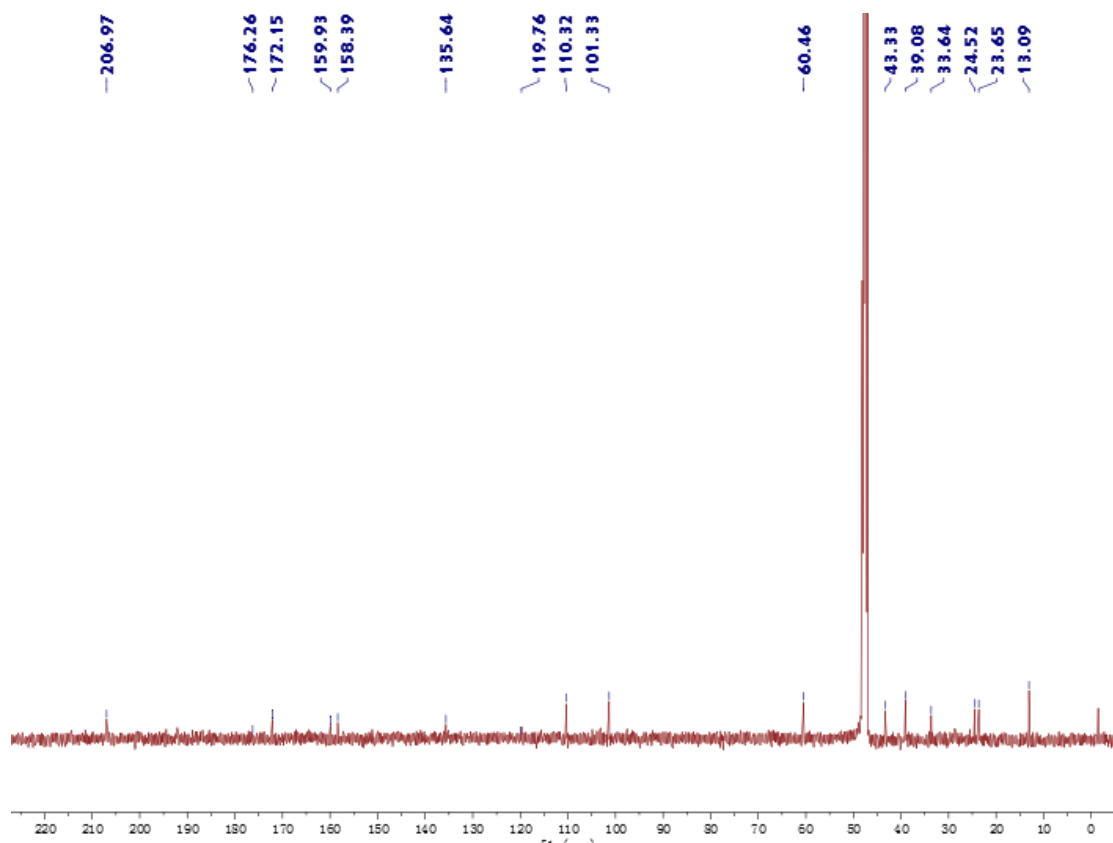

**Figure. S7**  $^1\text{H}$  NMR spectrum of compound **2** (500 MHz,  $\text{MeOD-}d_4$ ).

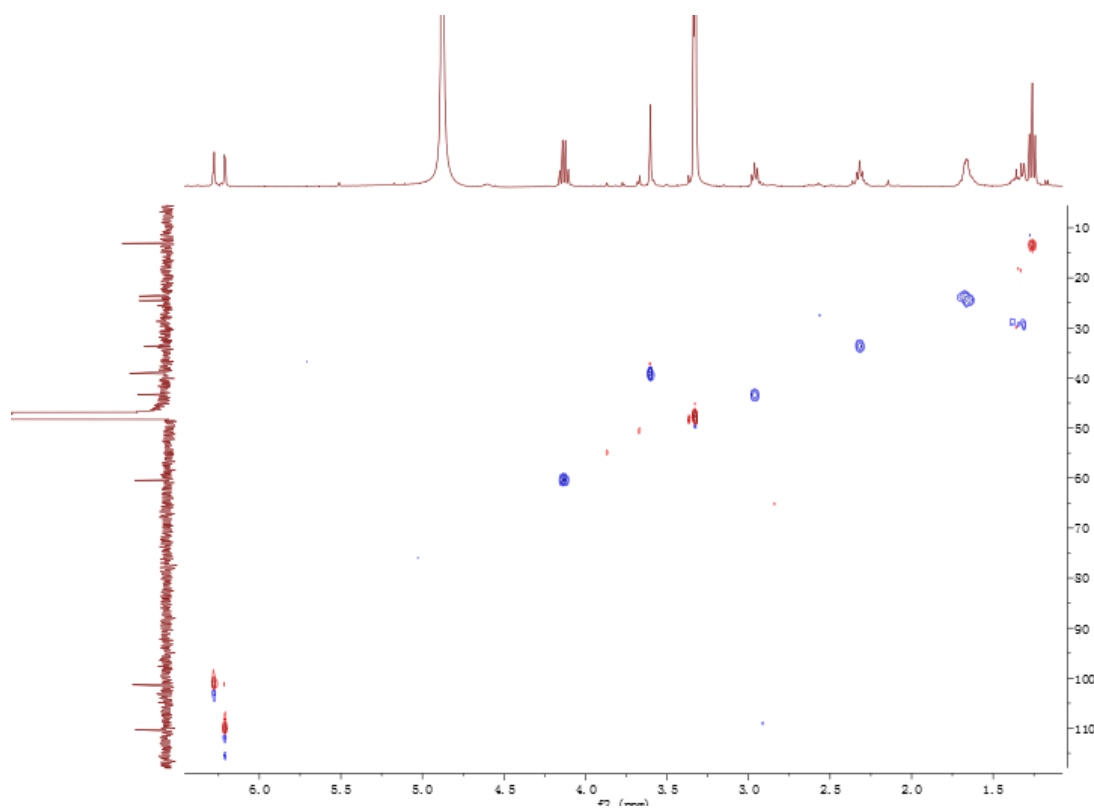

**Figure. S9** HSQC spectrum of compound **2**.

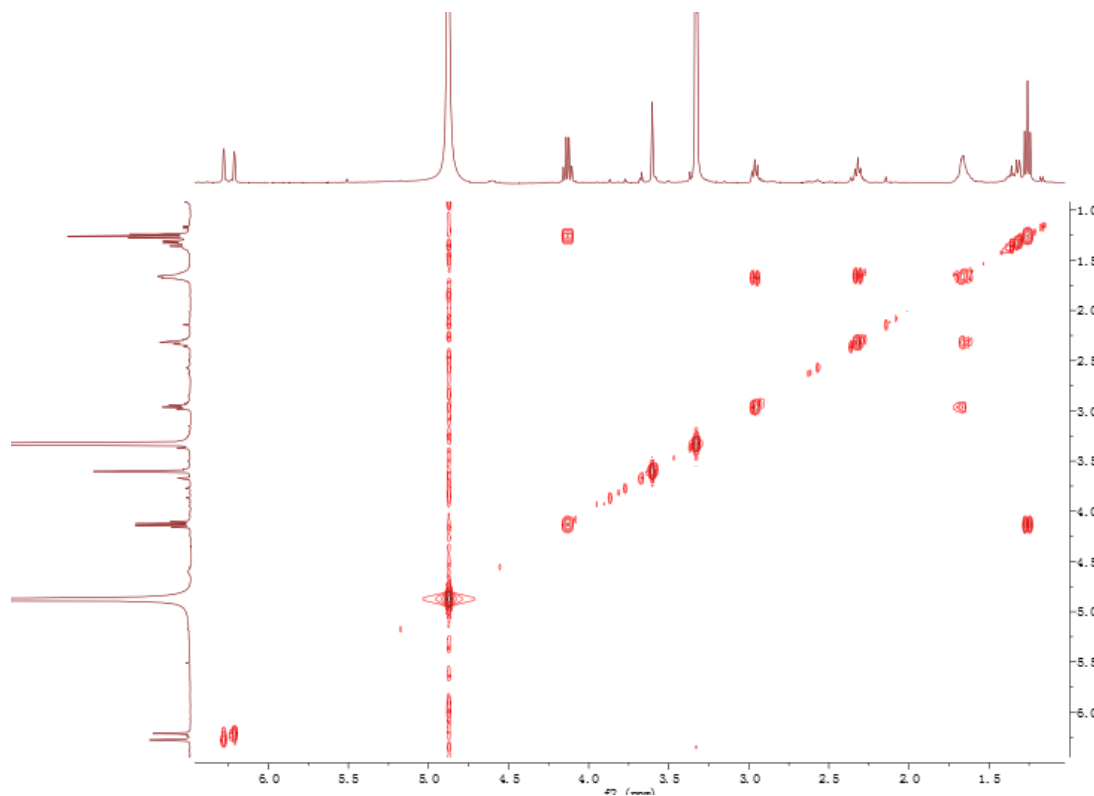

**Figure. S10**  $^1\text{H}$ - $^1\text{H}$  COSY spectrum of compound **2**.

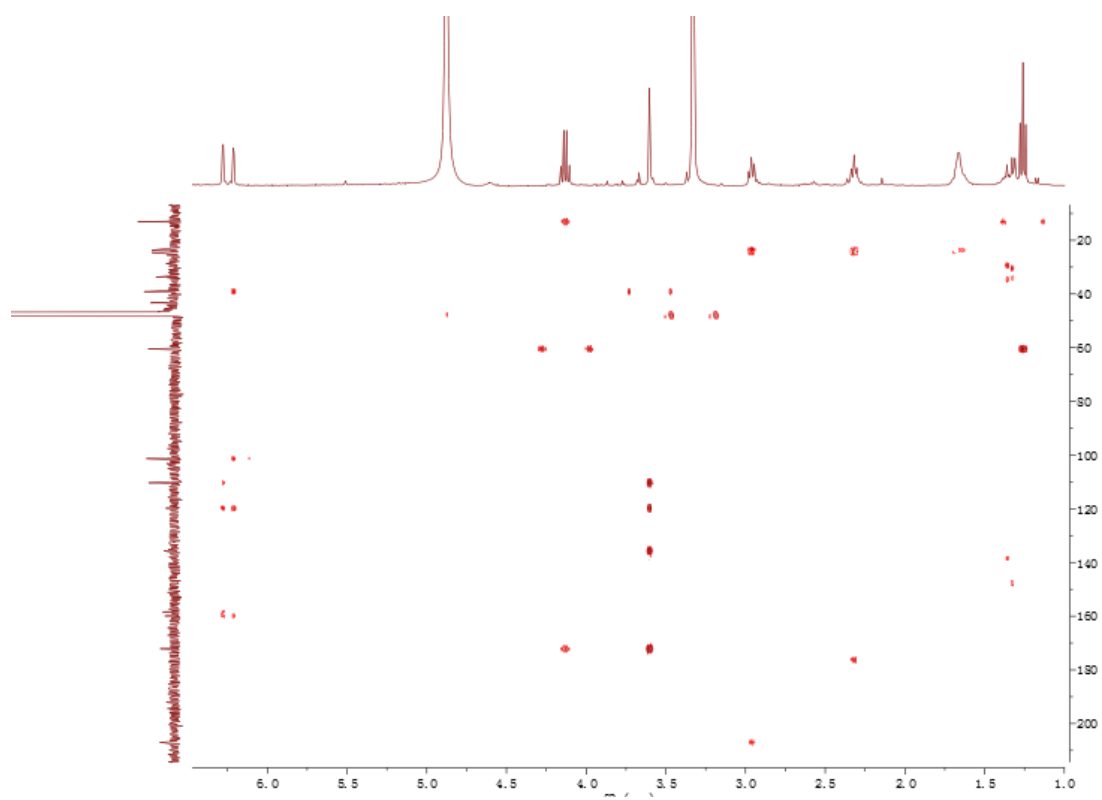

**Figure. S11** HMBC spectrum of compound **2**.

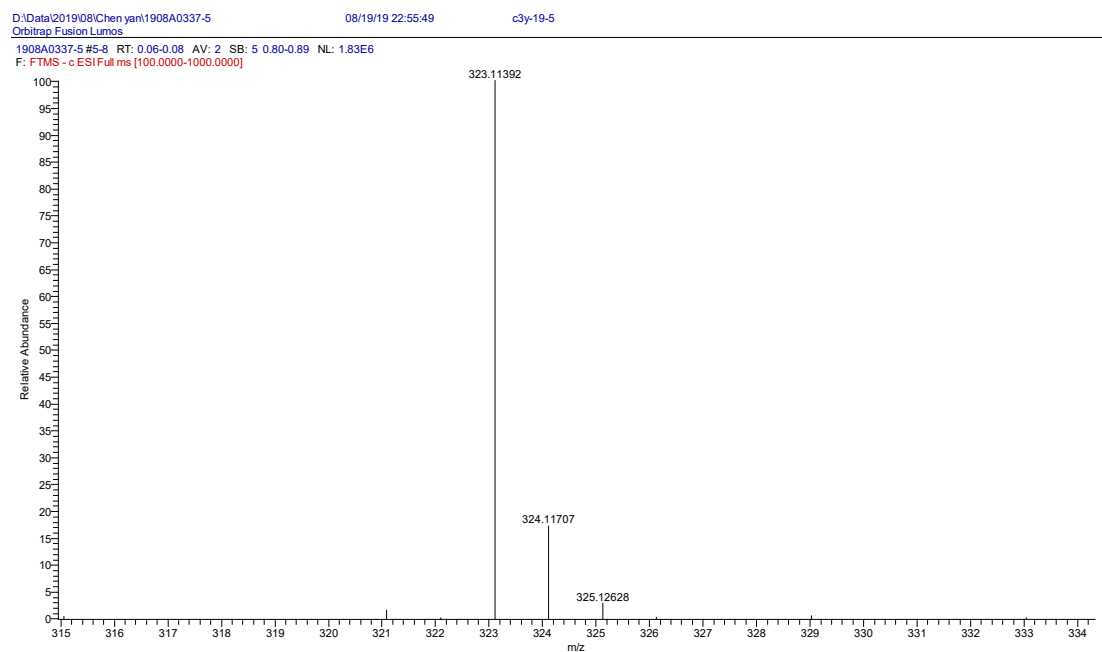

**Figure. S12** HRESIMS spectrum of compound **2**.

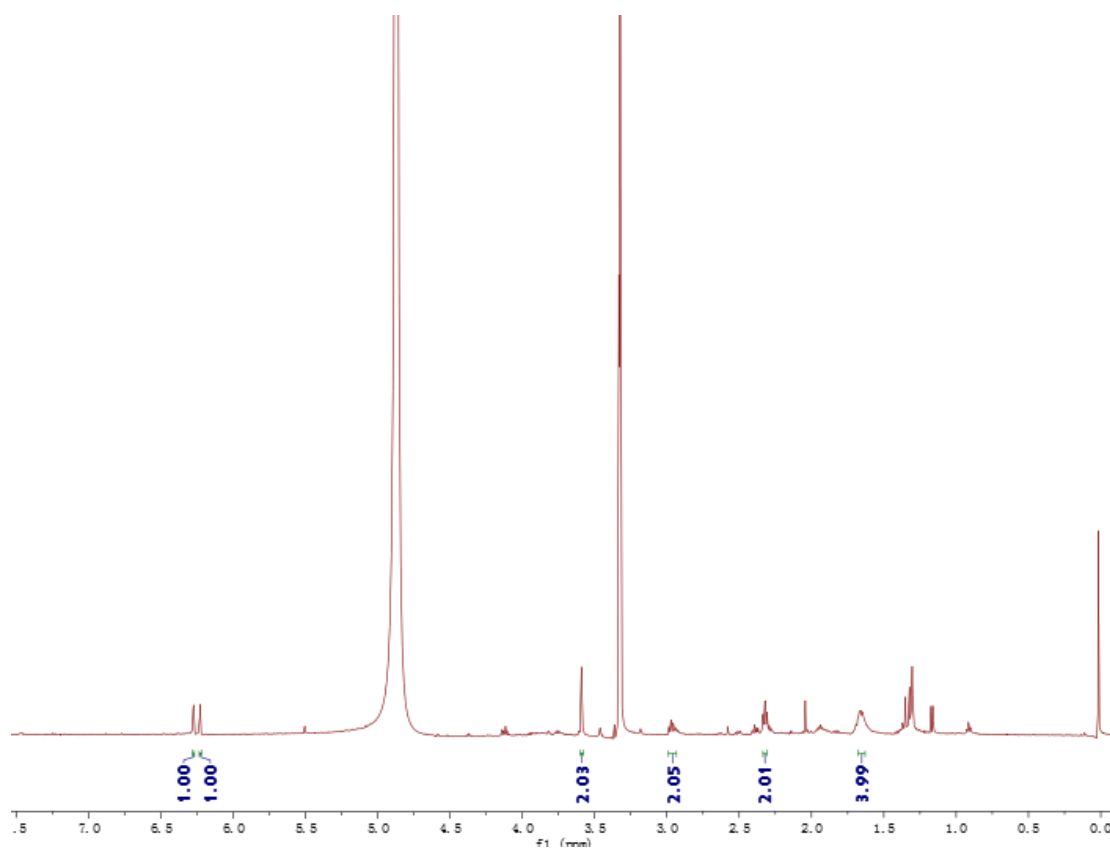

**Figure. S13** <sup>1</sup>H NMR spectrum of compound **3** (500 MHz, MeOD-*d*<sub>4</sub>).

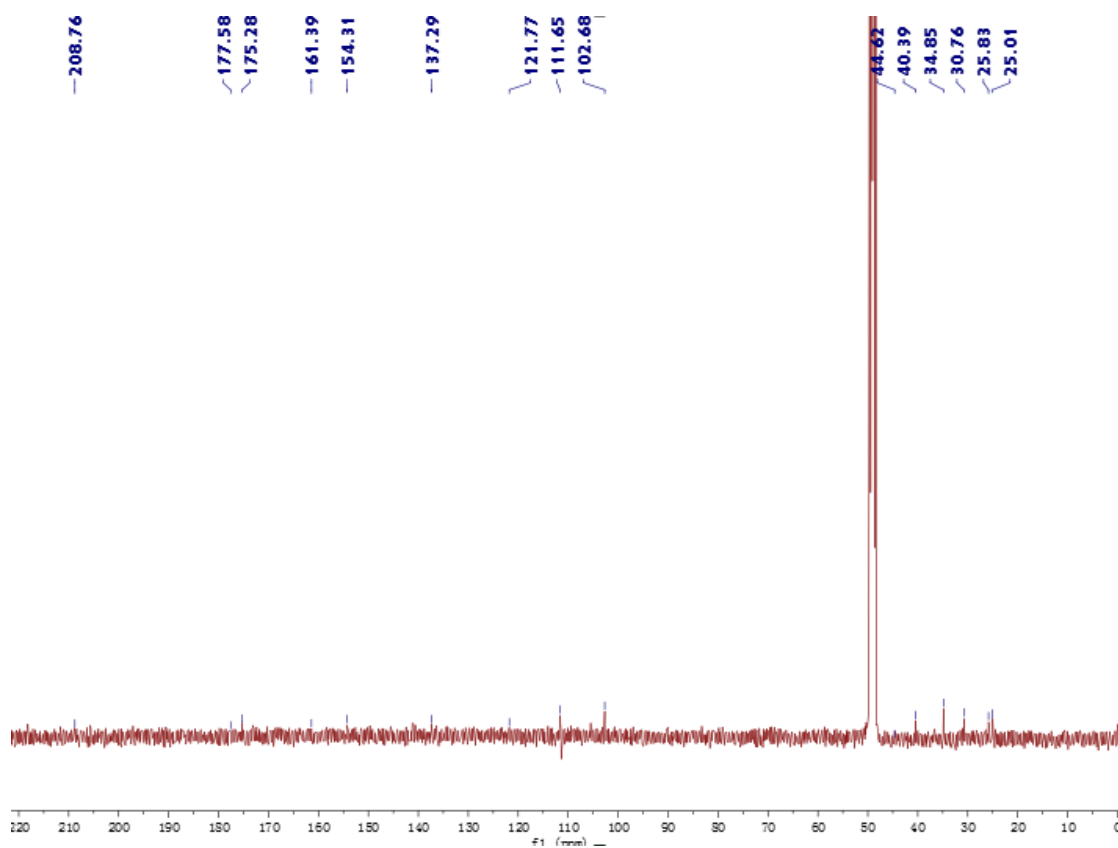

**Figure. S14**  $^{13}\text{C}$  NMR spectrum of compound **3** (125 MHz,  $\text{MeOD-}d_4$ ).

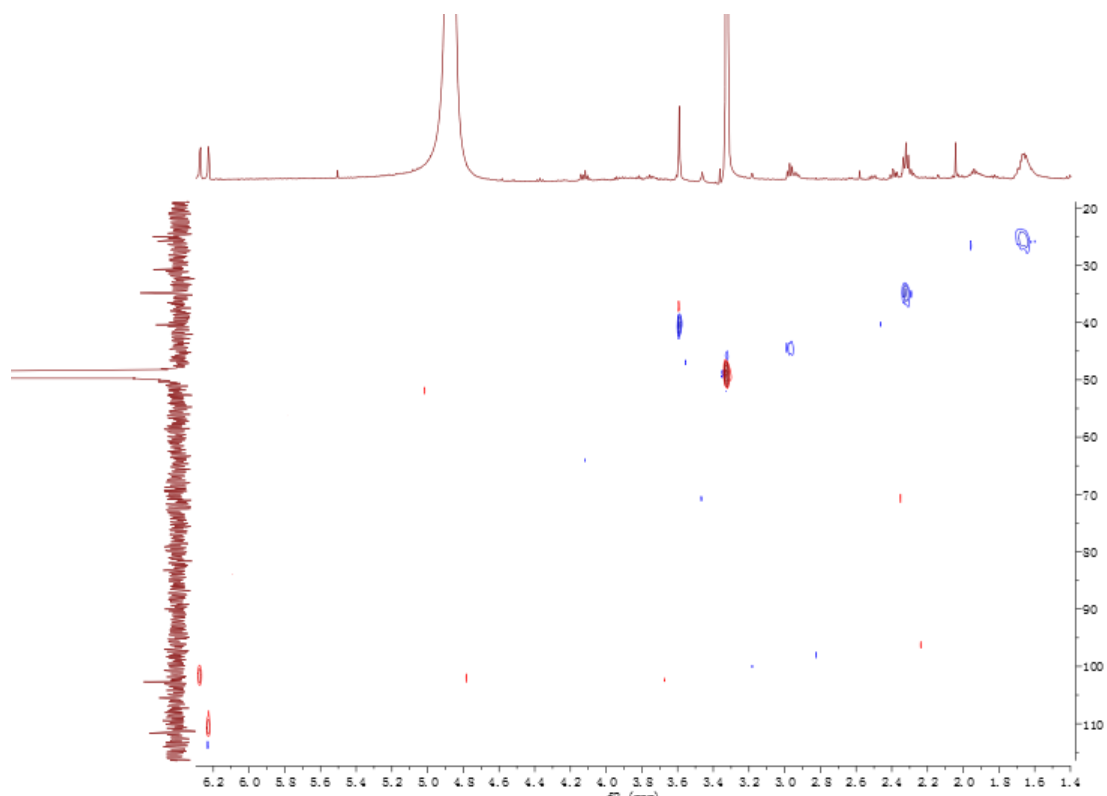

**Figure. S15** HSQC spectrum of compound **3**.

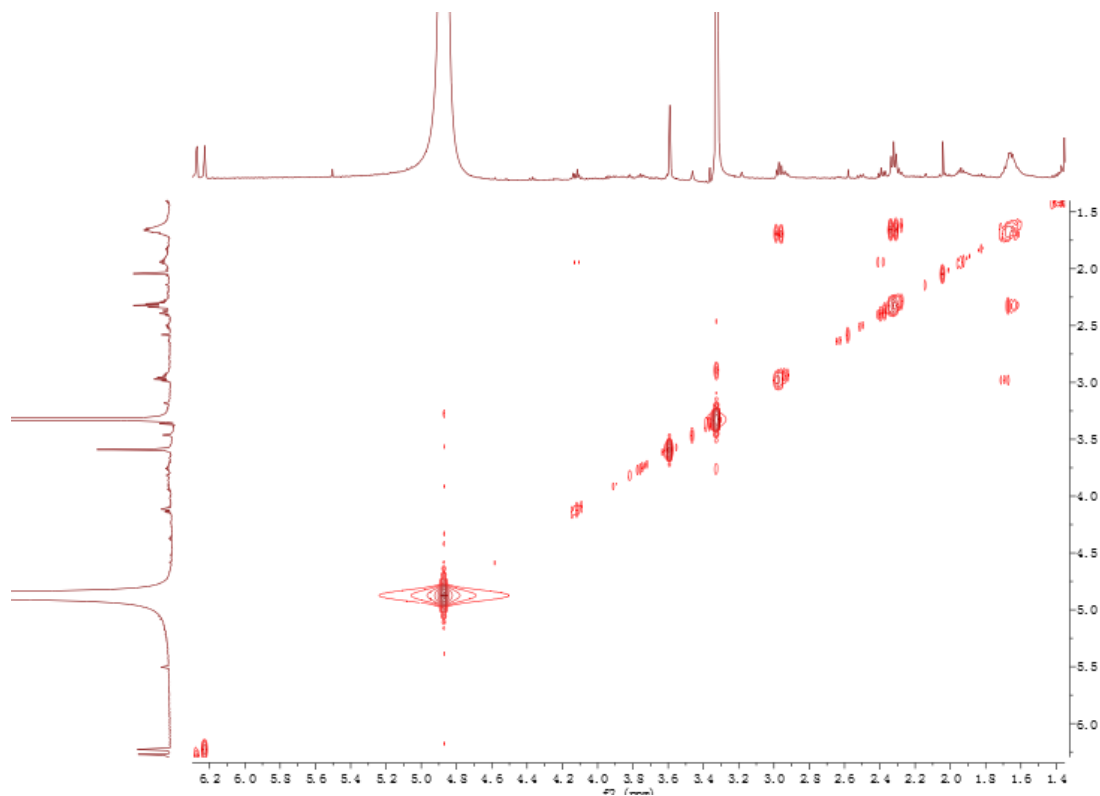

**Figure. S16**  $^1\text{H}$ - $^1\text{H}$  COSY spectrum of compound **3**.

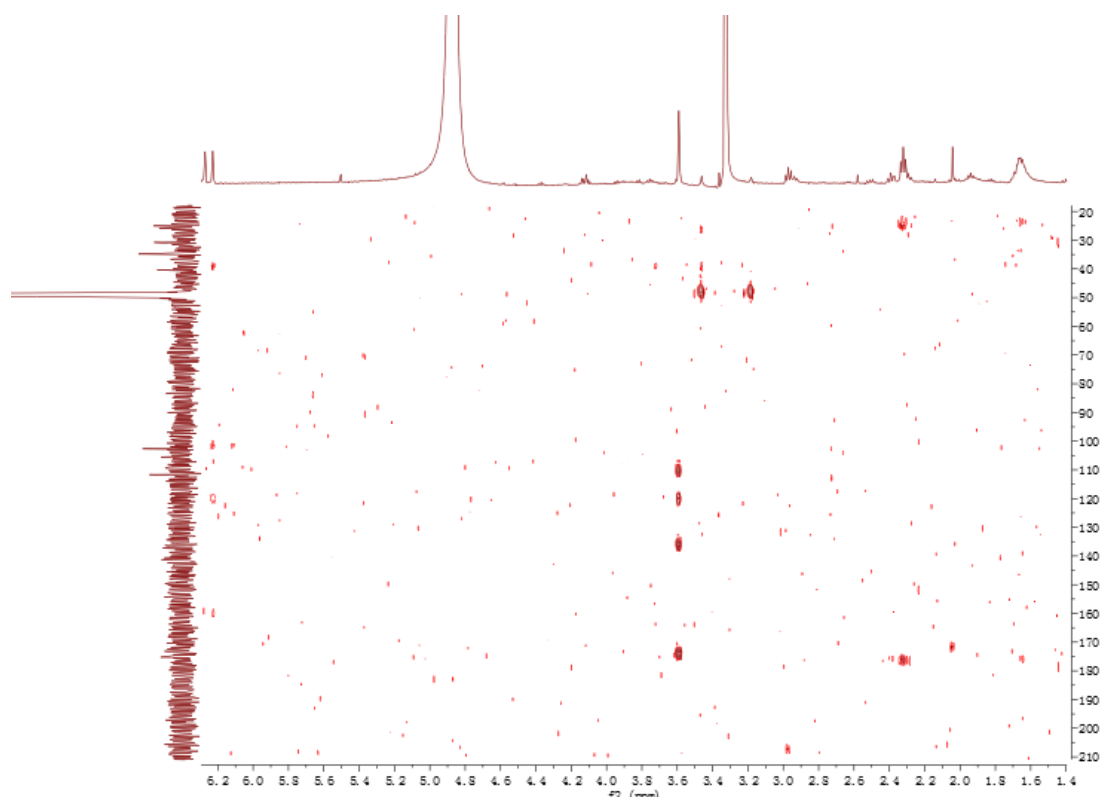

**Figure. S17** HMBC spectrum of compound **3**.

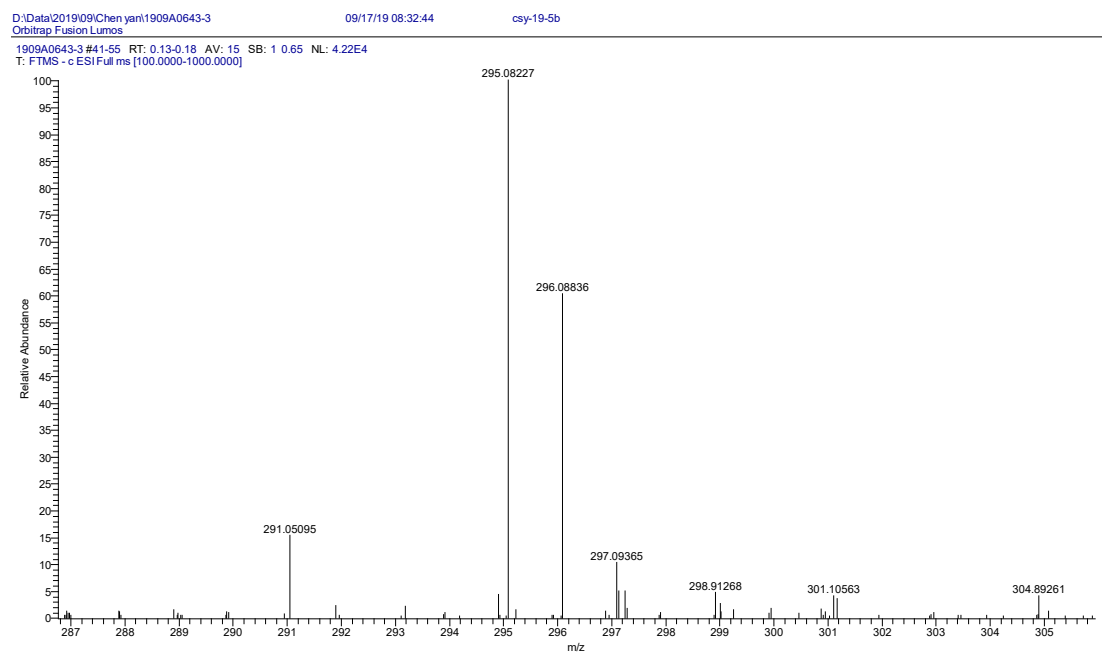

**Figure. S18** HRESIMS spectrum of compound **3**.

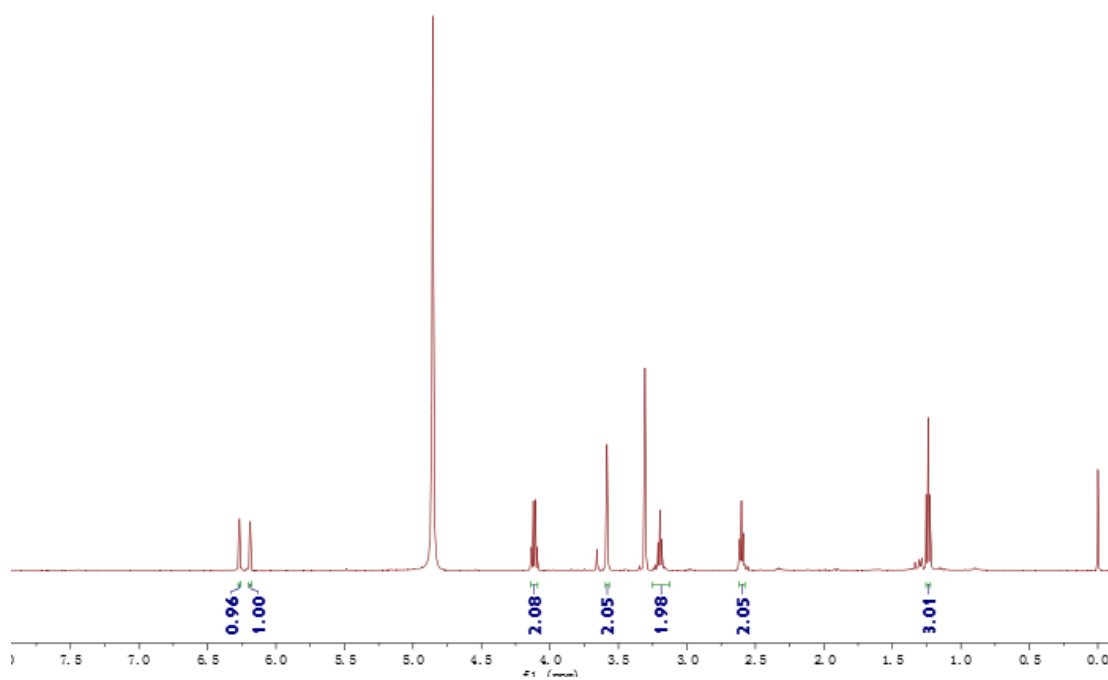

**Figure. S19** <sup>1</sup>H NMR spectrum of compound **4** (500 MHz, MeOD-*d*<sub>4</sub>).

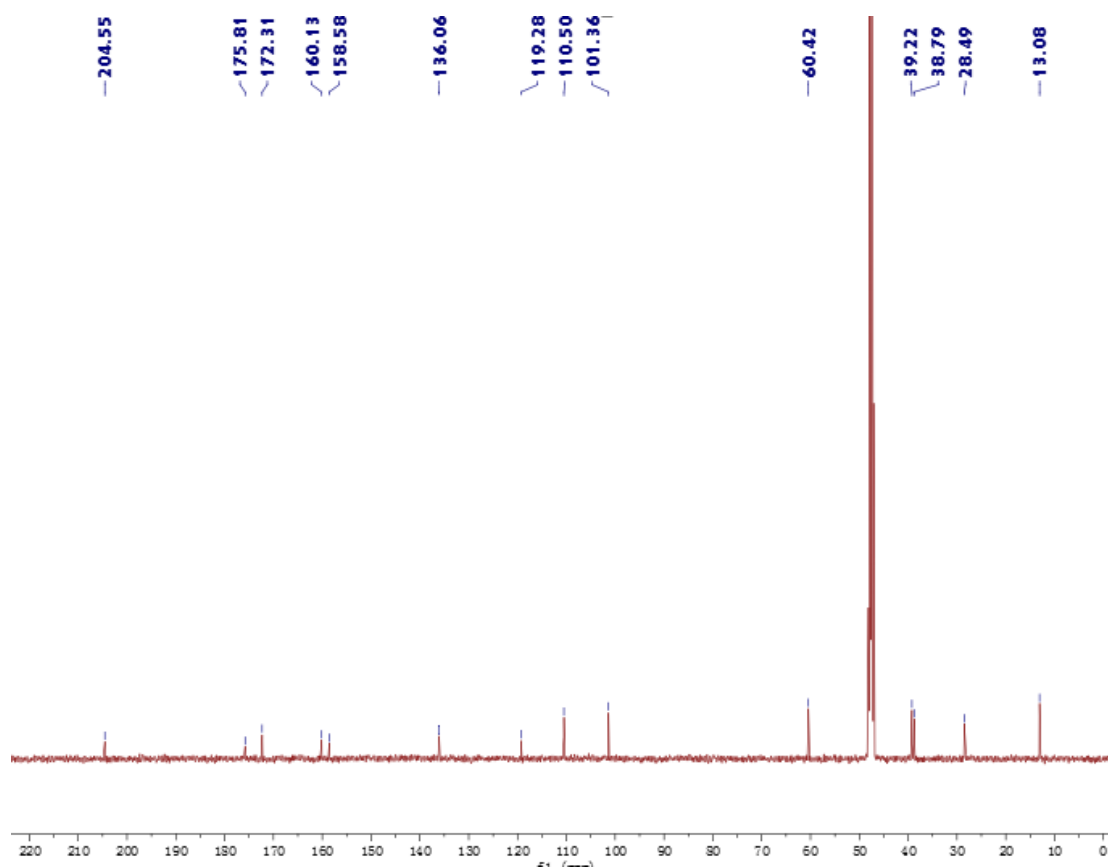

**Figure. S20** <sup>13</sup>C NMR spectrum of compound **4** (125 MHz, MeOD-*d*<sub>4</sub>).

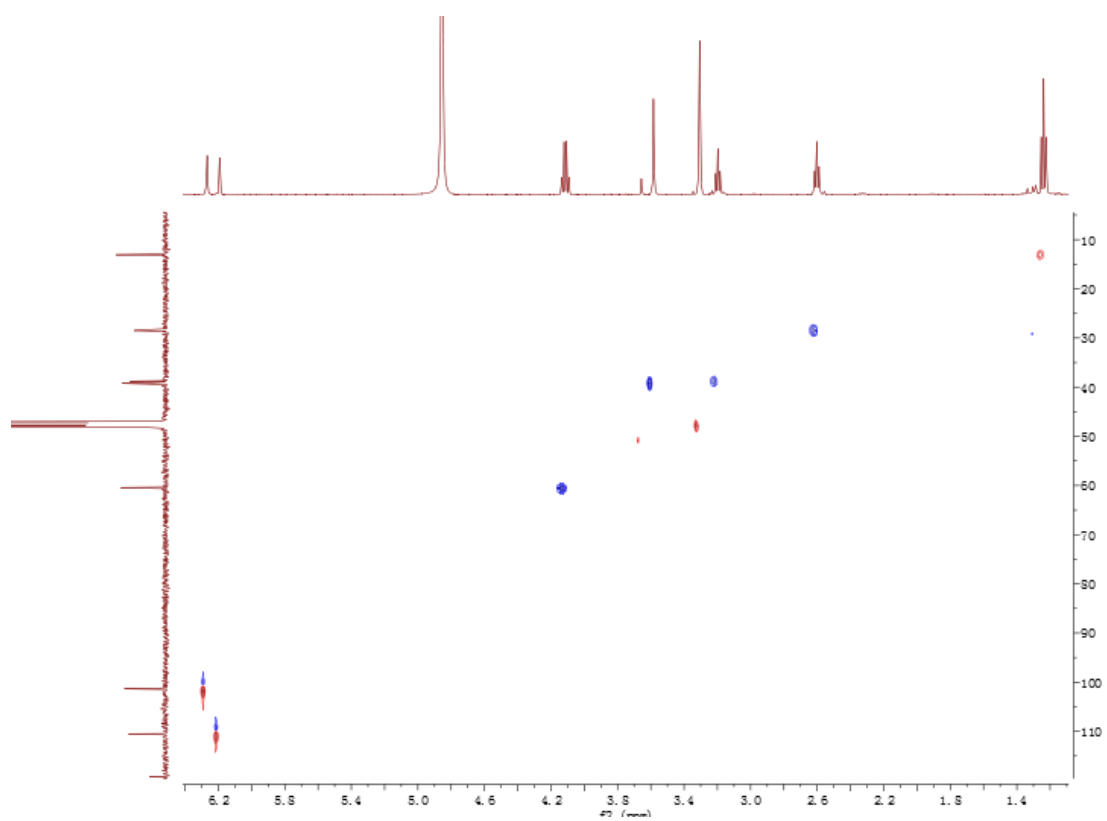

**Figure. S21** HSQC spectrum of compound **4**.

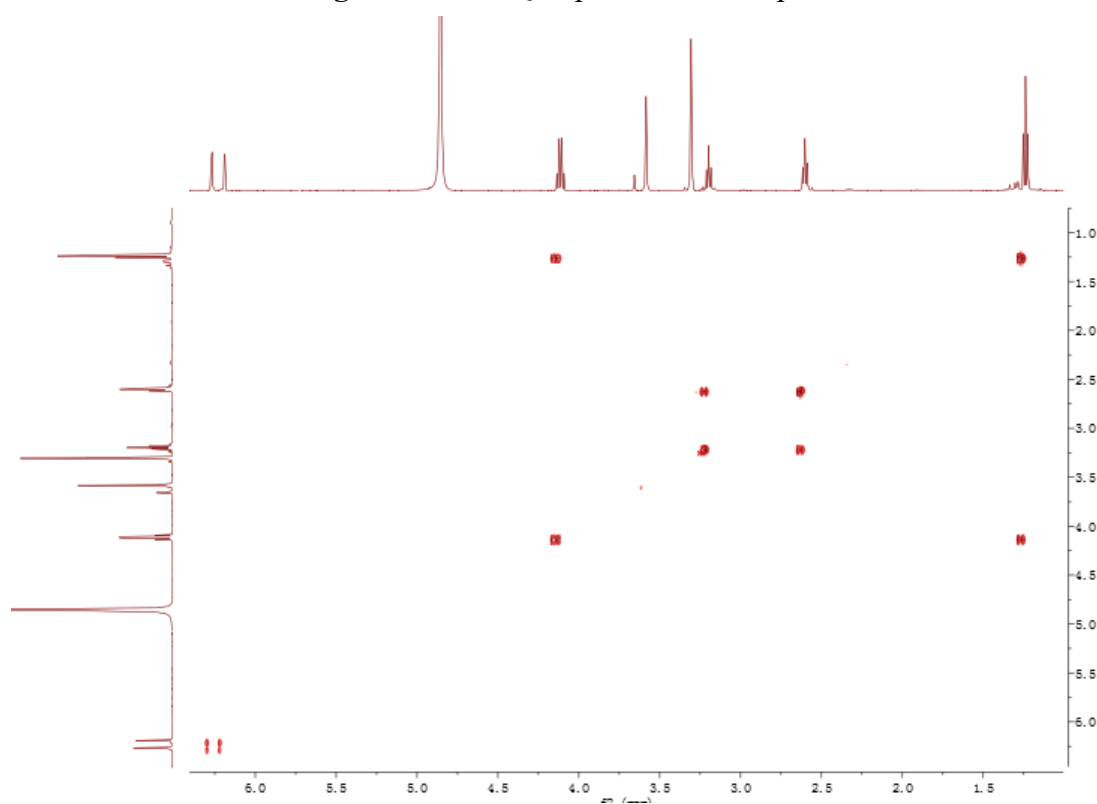

**Figure. S22**  $^1\text{H}$ - $^1\text{H}$  COSY spectrum of compound **4**.

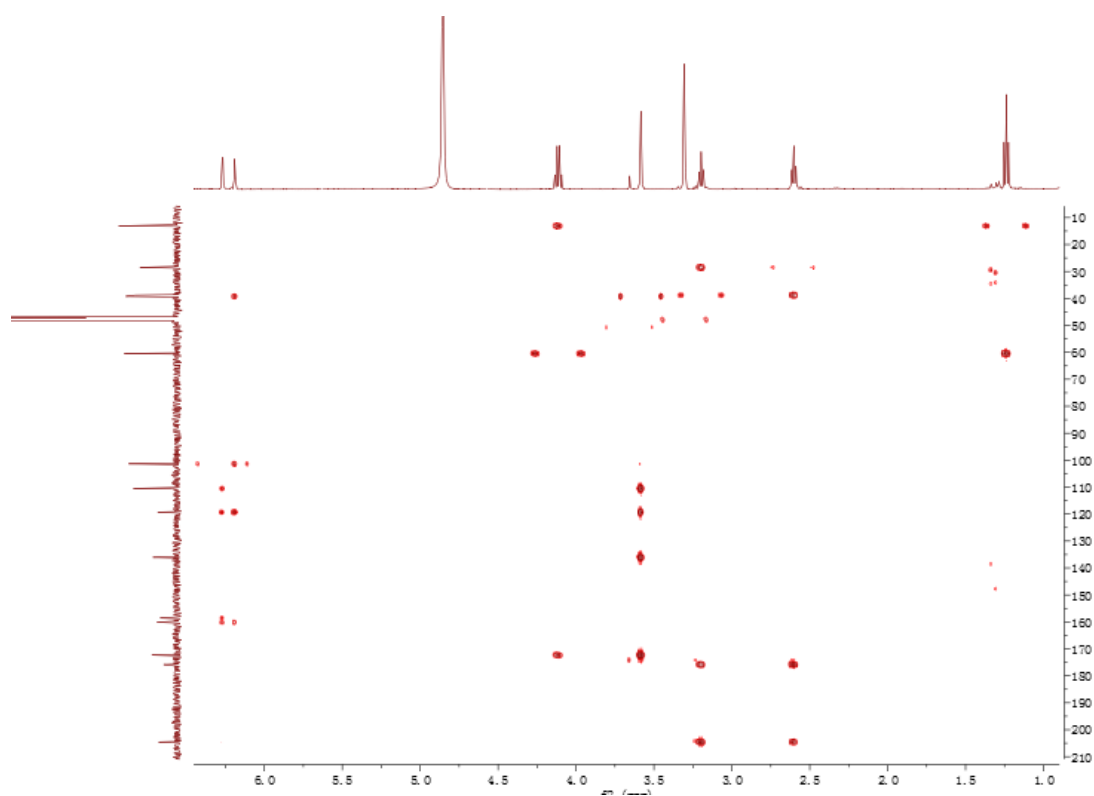

**Figure. S23** HMBC spectrum of compound **4**.

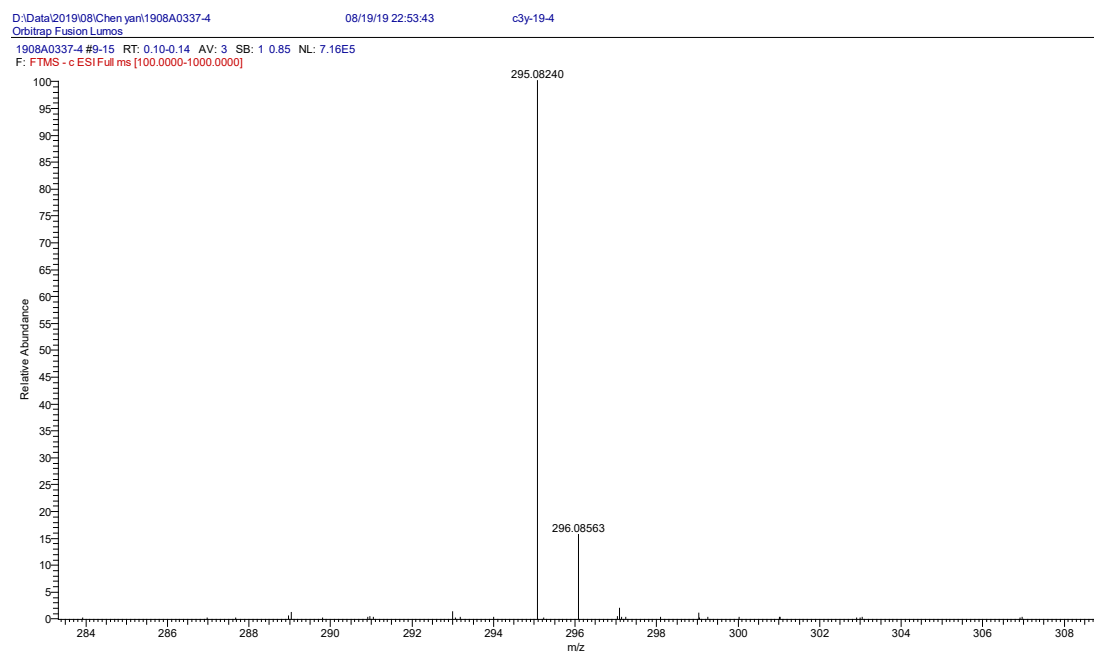

**Figure. S24** HRESIMS spectrum of compound **4**.

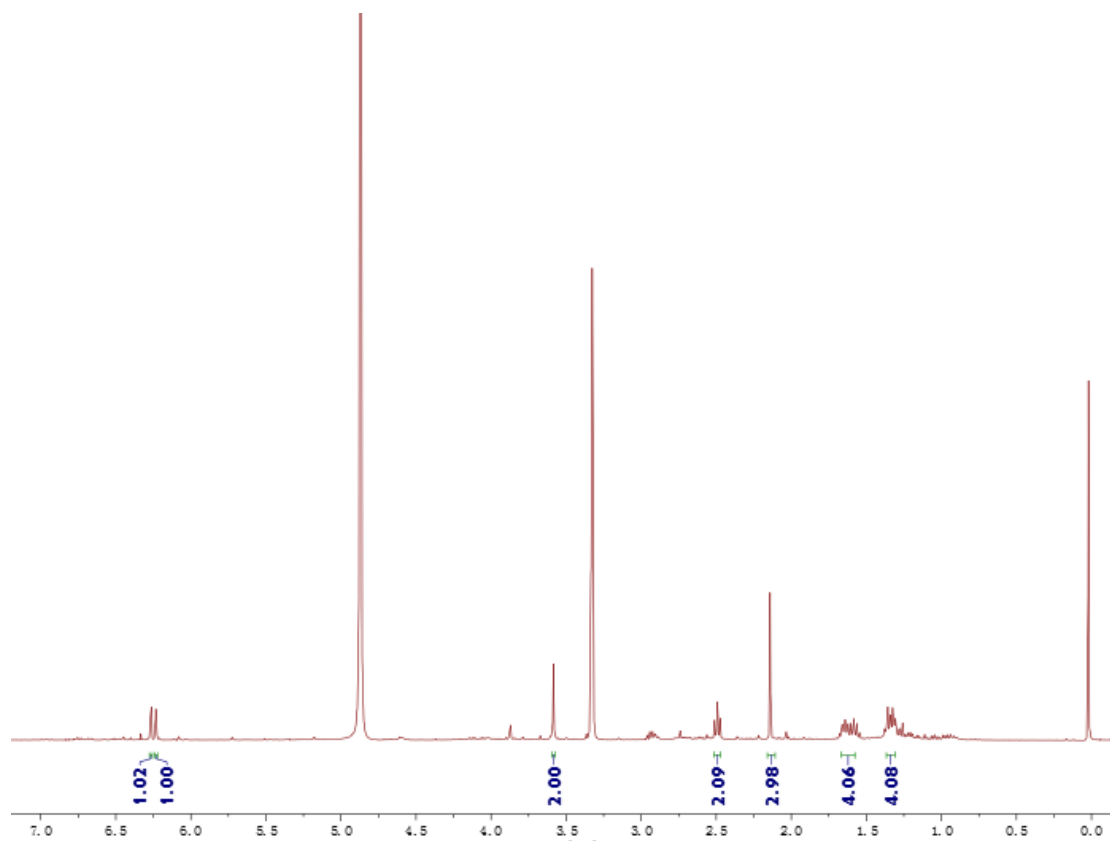

**Figure. S25** <sup>1</sup>H NMR spectrum of compound **5** (500 MHz, MeOD-*d*<sub>4</sub>).

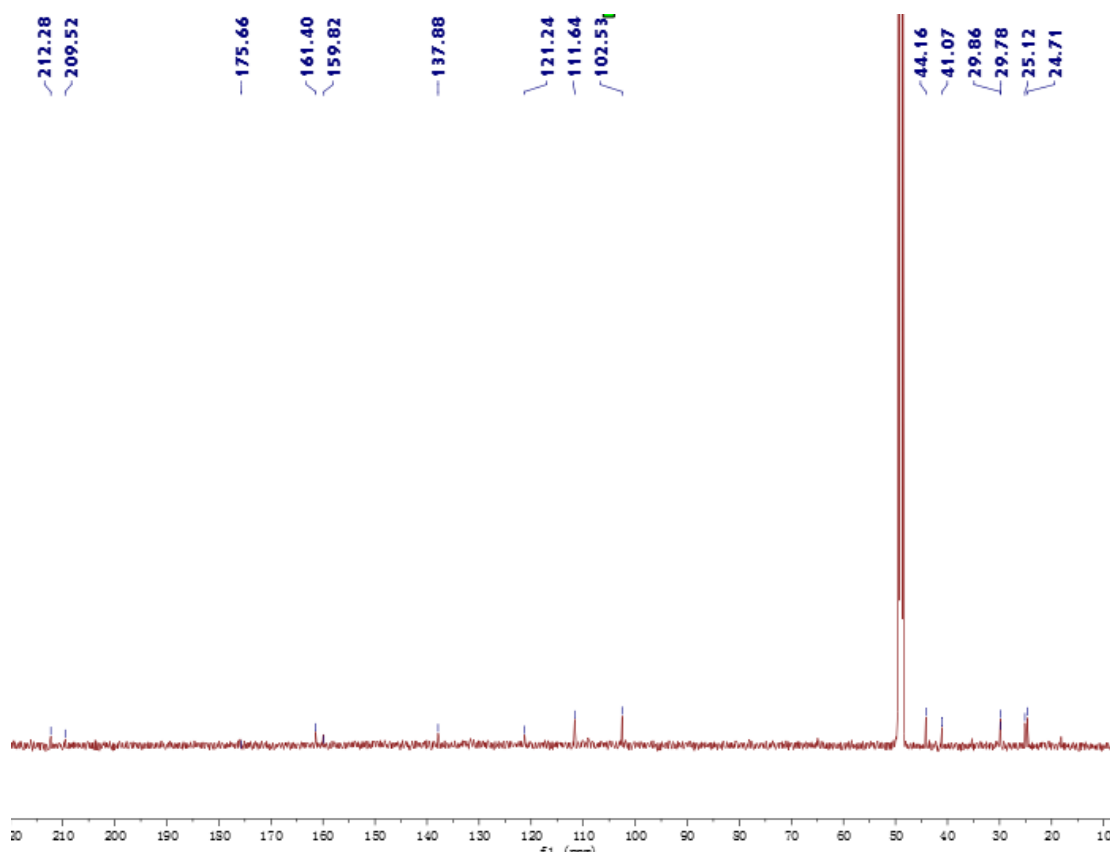

**Figure. S26** <sup>13</sup>C NMR spectrum of compound **5** (125 MHz, MeOD-*d*<sub>4</sub>).

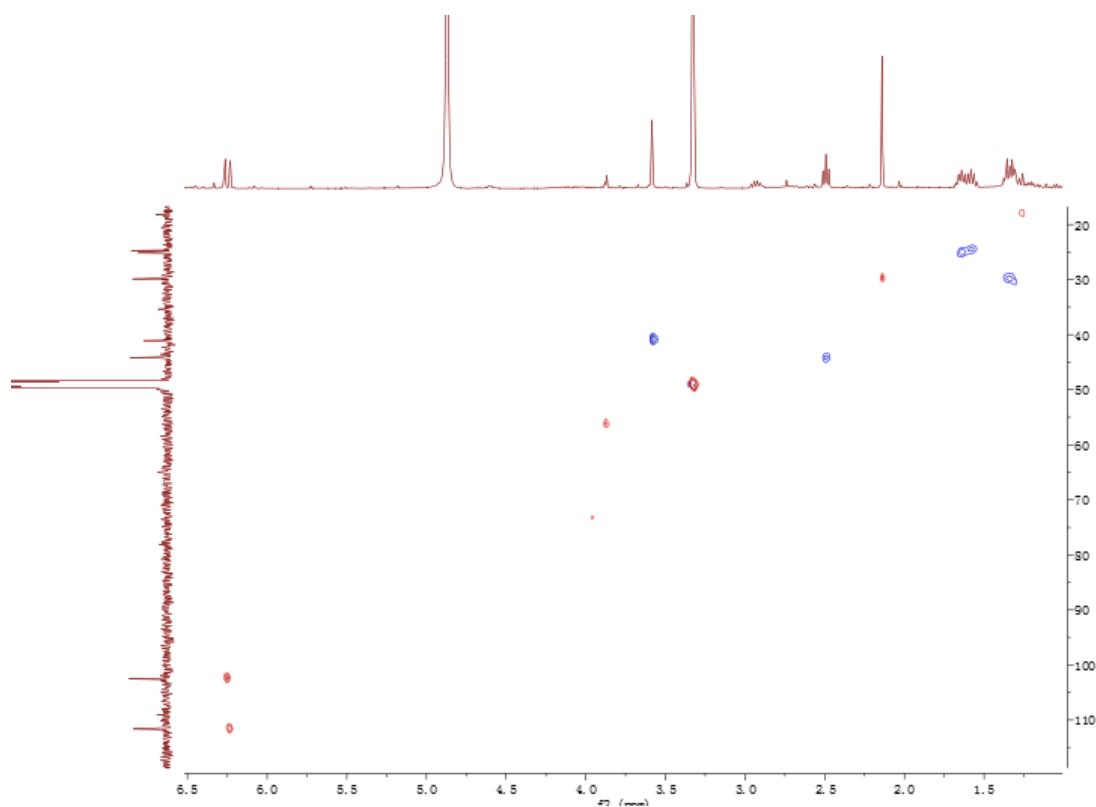

**Figure. S27** HSQC spectrum of compound **5**.

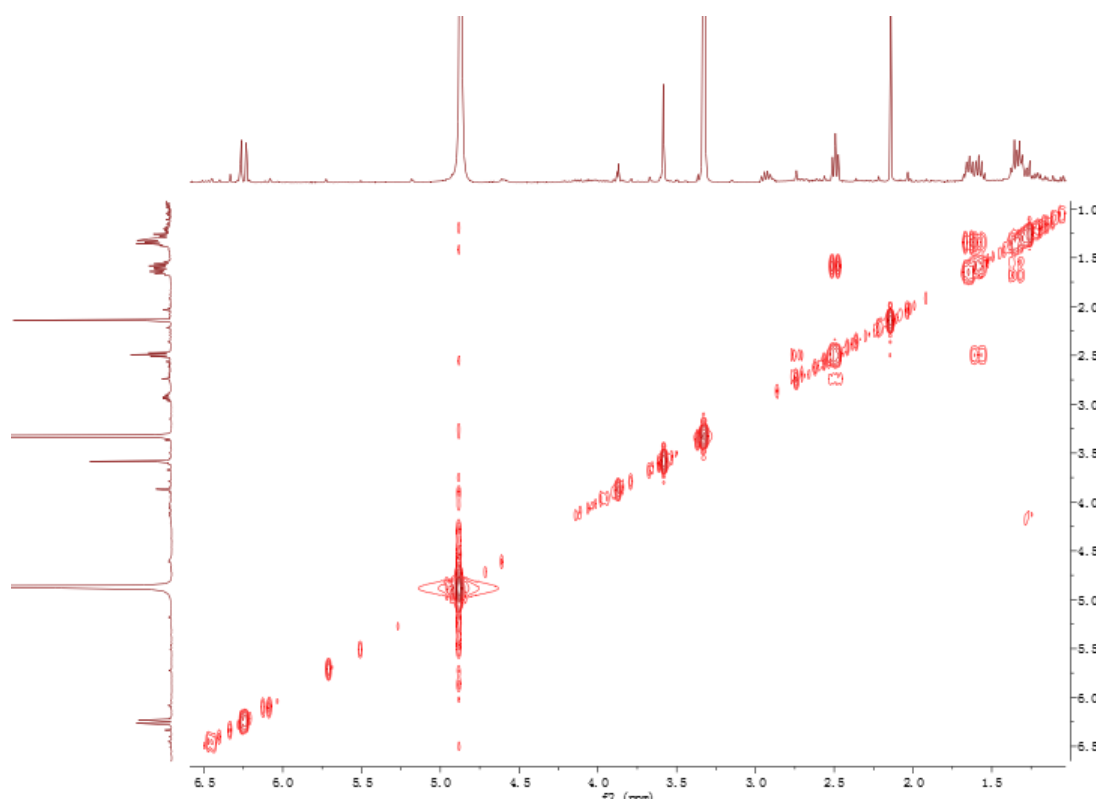

**Figure. S28**  $^1\text{H}$ - $^1\text{H}$  COSY spectrum of compound **5**.

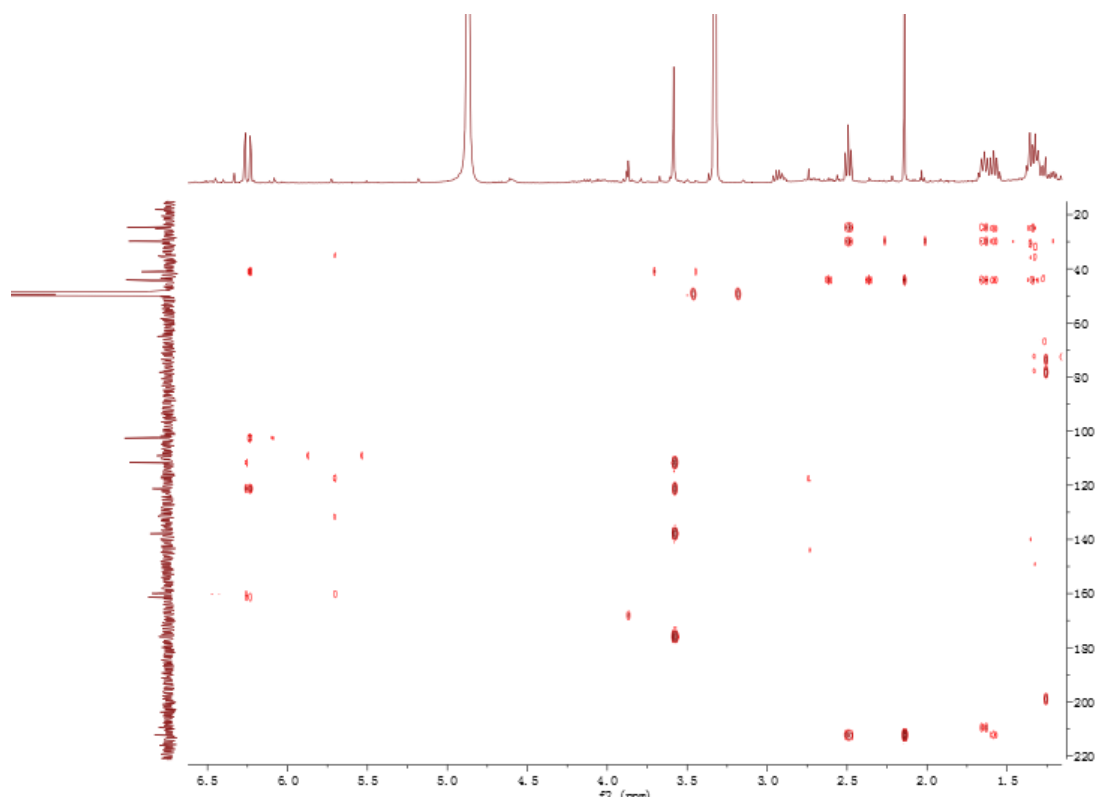

**Figure. S29** HMBC spectrum of compound **5**.

**Acquisition Parameter**

|             |            |                       |           |                  |           |
|-------------|------------|-----------------------|-----------|------------------|-----------|
| Source Type | ESI        | Ion Polarity          | Positive  | Set Nebulizer    | 0.6 Bar   |
| Focus       | Not active | Set Capillary         | 3500 V    | Set Dry Heater   | 200 °C    |
| Scan Begin  | 100 m/z    | Set End Plate Offset  | -500 V    | Set Dry Gas      | 6.0 l/min |
| Scan End    | 1000 m/z   | Set Collision Cell RF | 700.0 Vpp | Set Divert Valve | Waste     |

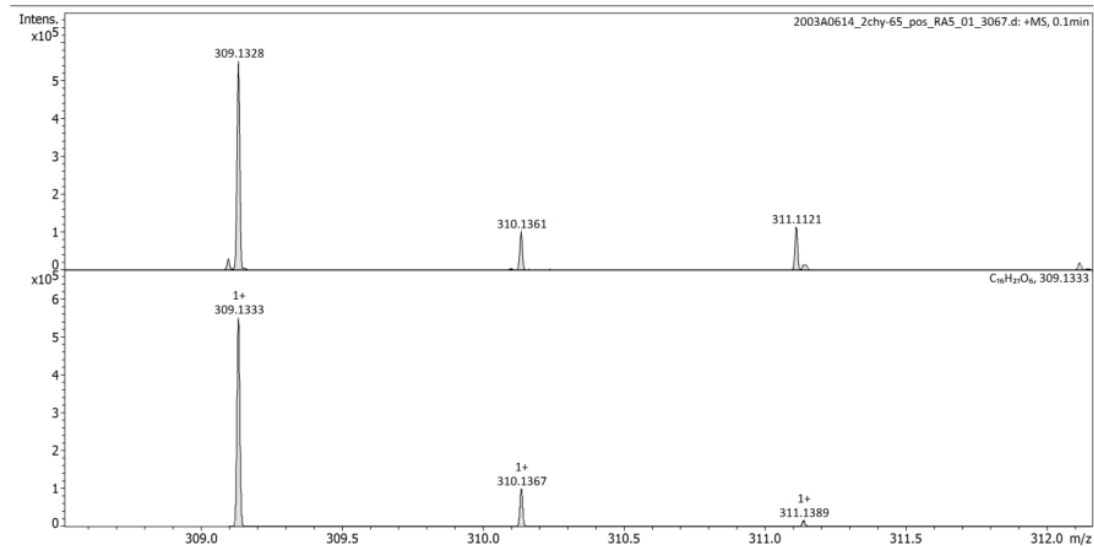

**Figure. S30** HRESIMS spectrum of compound **5**.

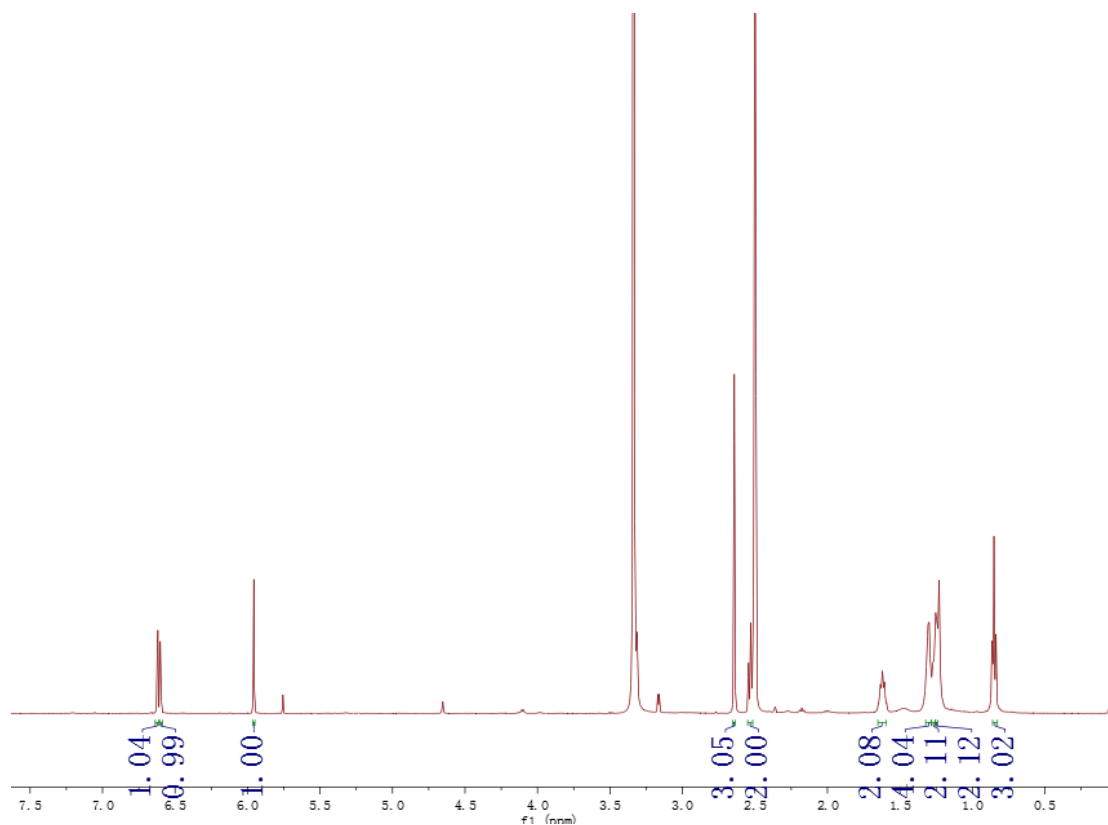

**Figure. S31** <sup>1</sup>H NMR spectrum of compound **13** (500 MHz, DMSO-*d*<sub>6</sub>).

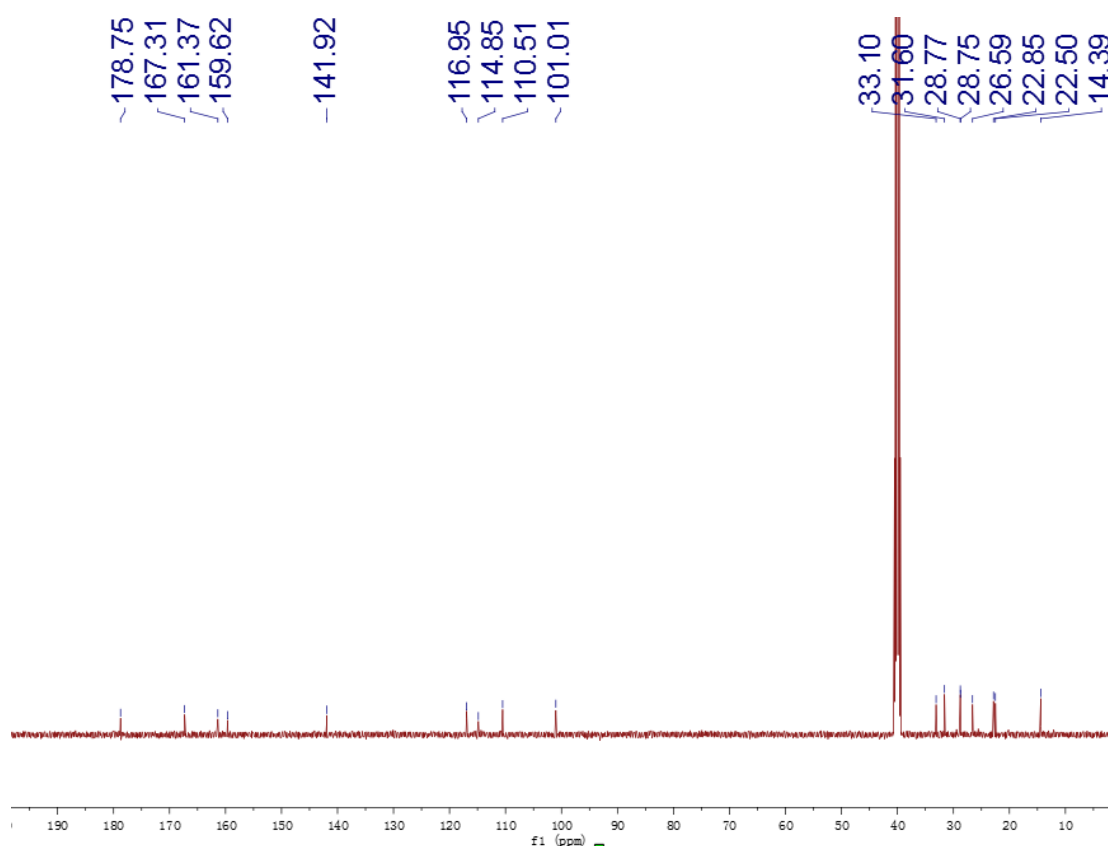

**Figure. S32** <sup>13</sup>C NMR spectrum of compound **13** (125 MHz, DMSO-*d*<sub>6</sub>).

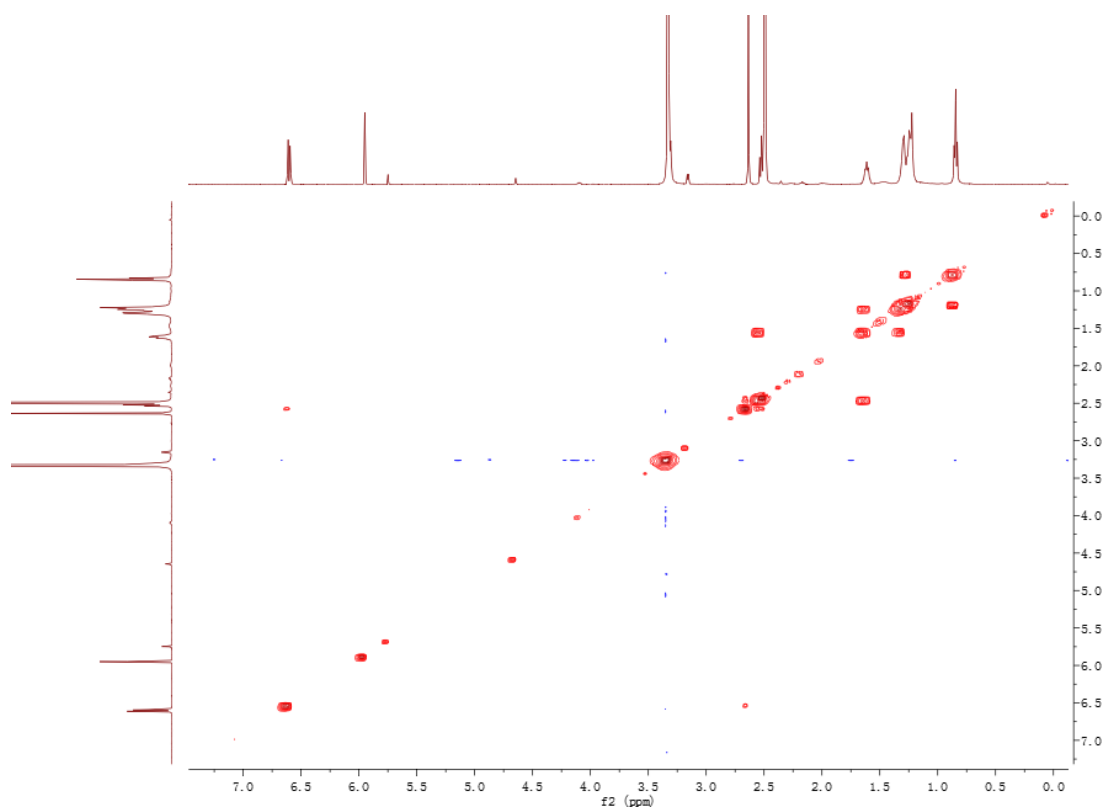

**Figure. S33** HSQC spectrum of compound 13.

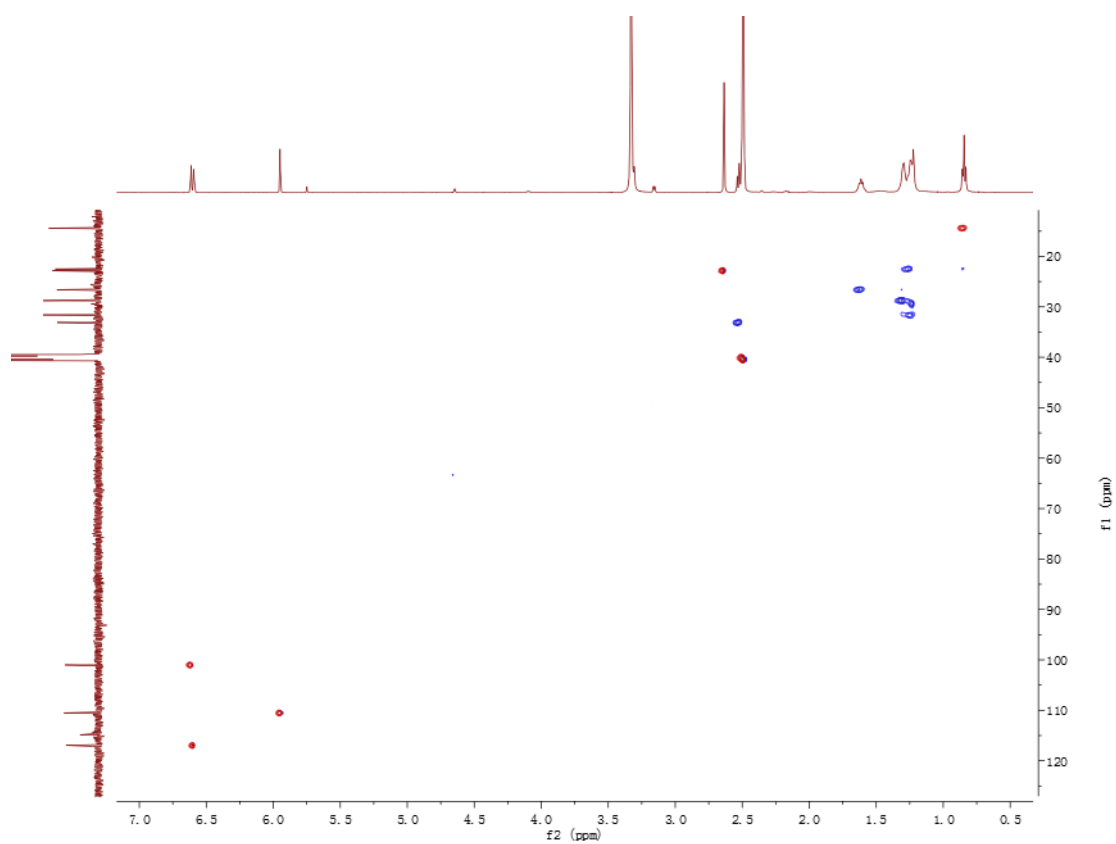

**Figure. S34**  $^1\text{H}$ - $^1\text{H}$  COSY spectrum of compound 13.

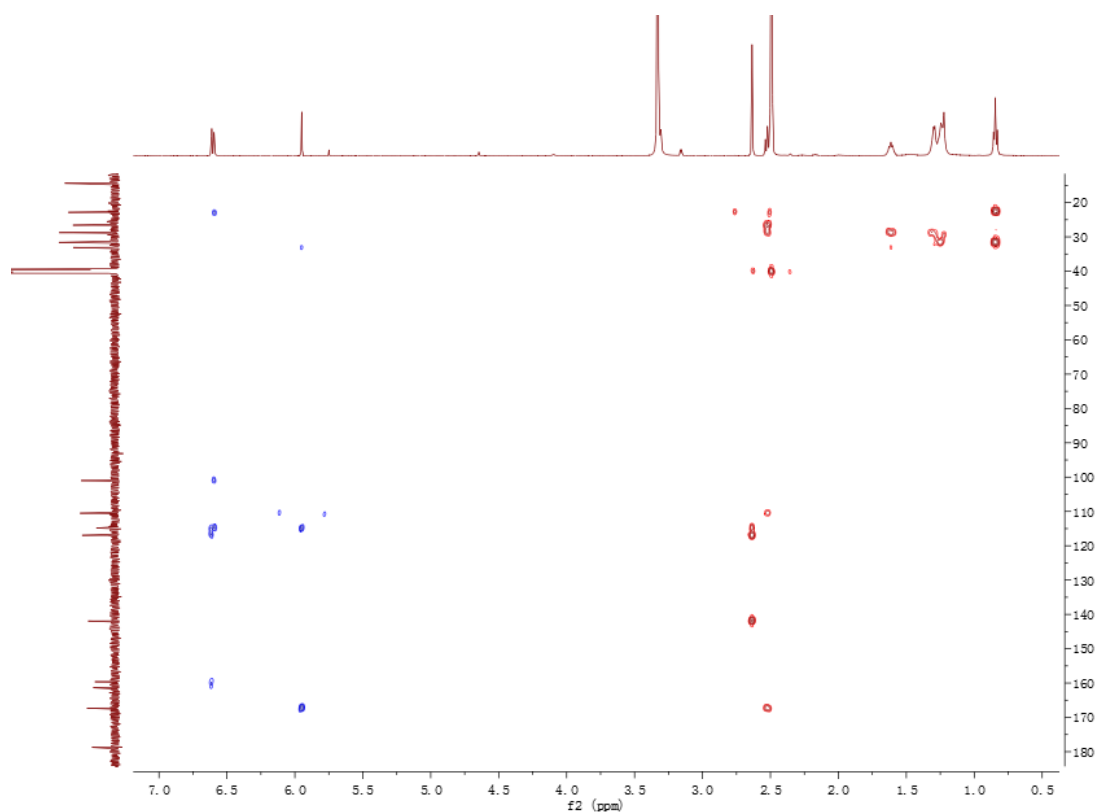

**Figure. S35** HMBC spectrum of compound **13**.

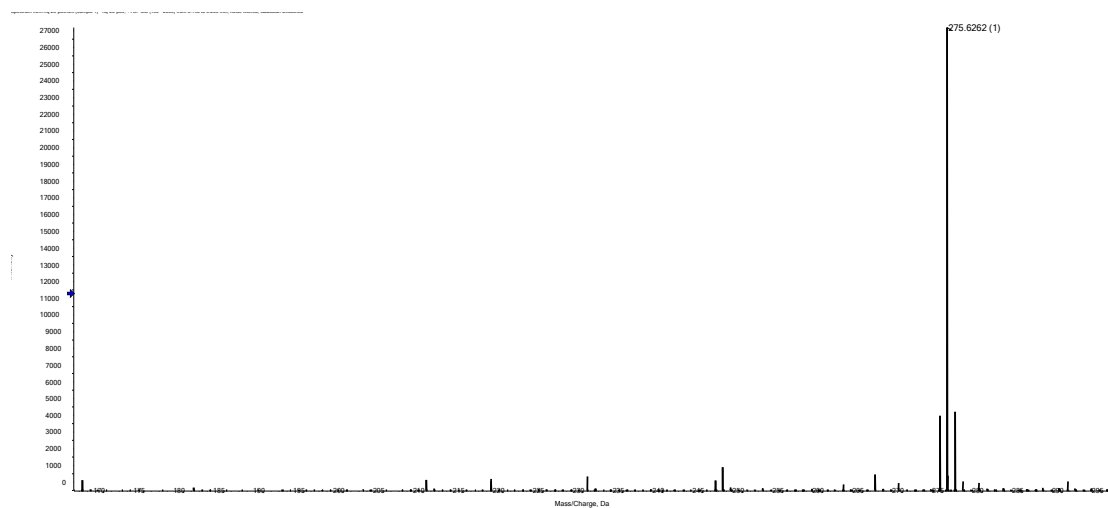

**Figure. S36** HRESIMS spectrum of compound **13**.

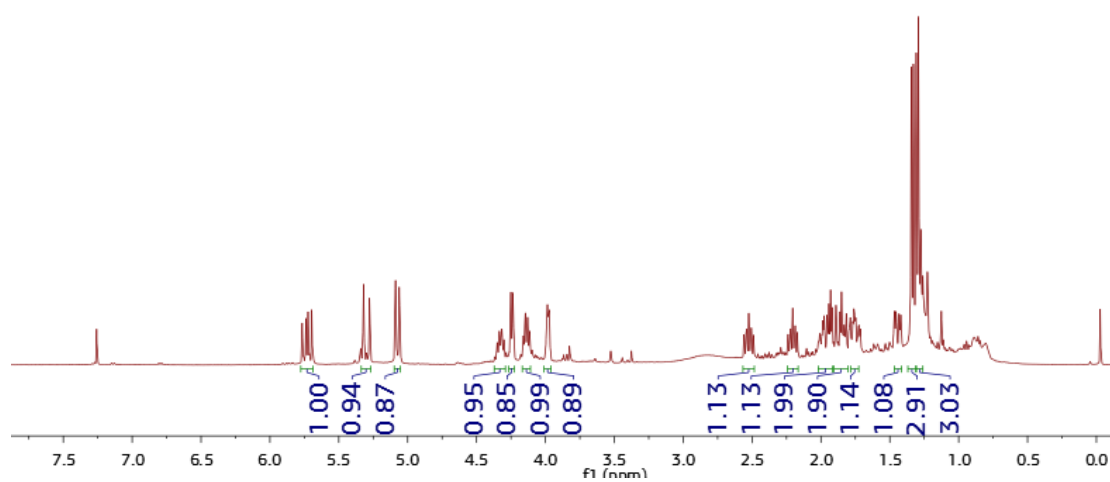

**Figure. S37** <sup>1</sup>H NMR spectrum of compound **14** (500 MHz, DMSO-*d*<sub>6</sub>).

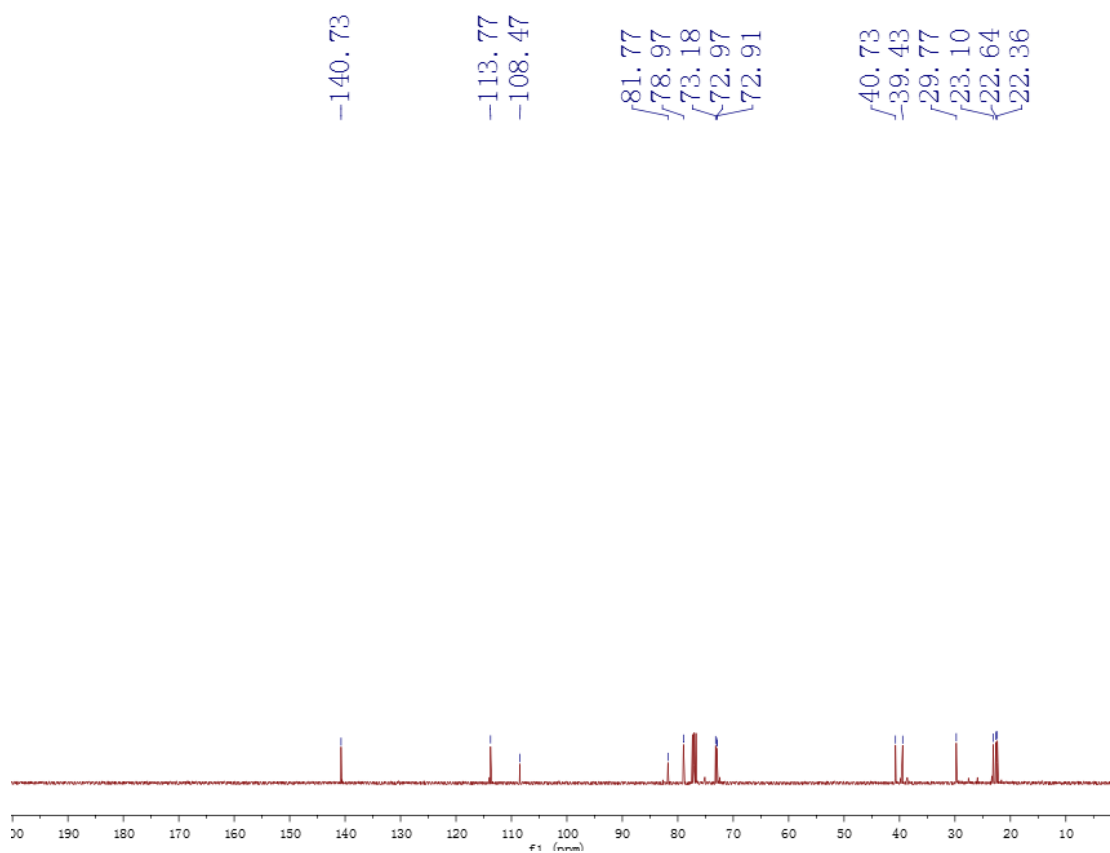

**Figure. S38** <sup>13</sup>C NMR spectrum of compound **14** (125 MHz, DMSO-*d*<sub>6</sub>).

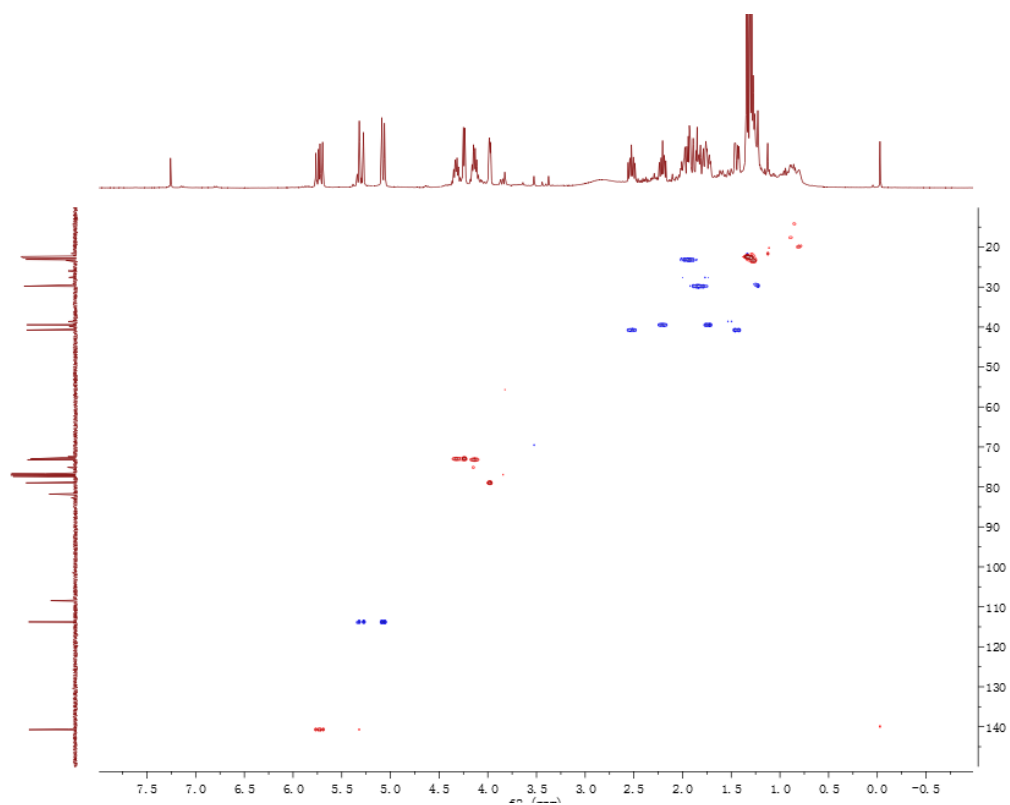

**Figure. S39** HSQC spectrum of compound **14**.

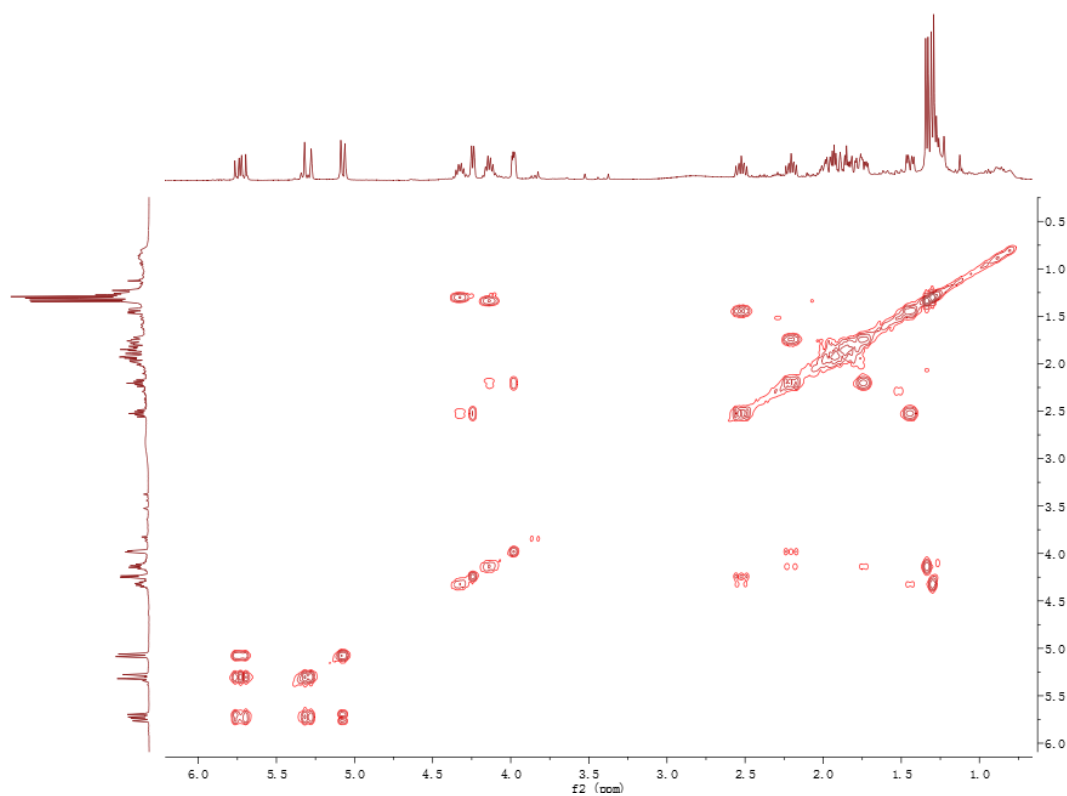

**Figure. S40**  $^1\text{H}$ - $^1\text{H}$  COSY spectrum of compound **14**.

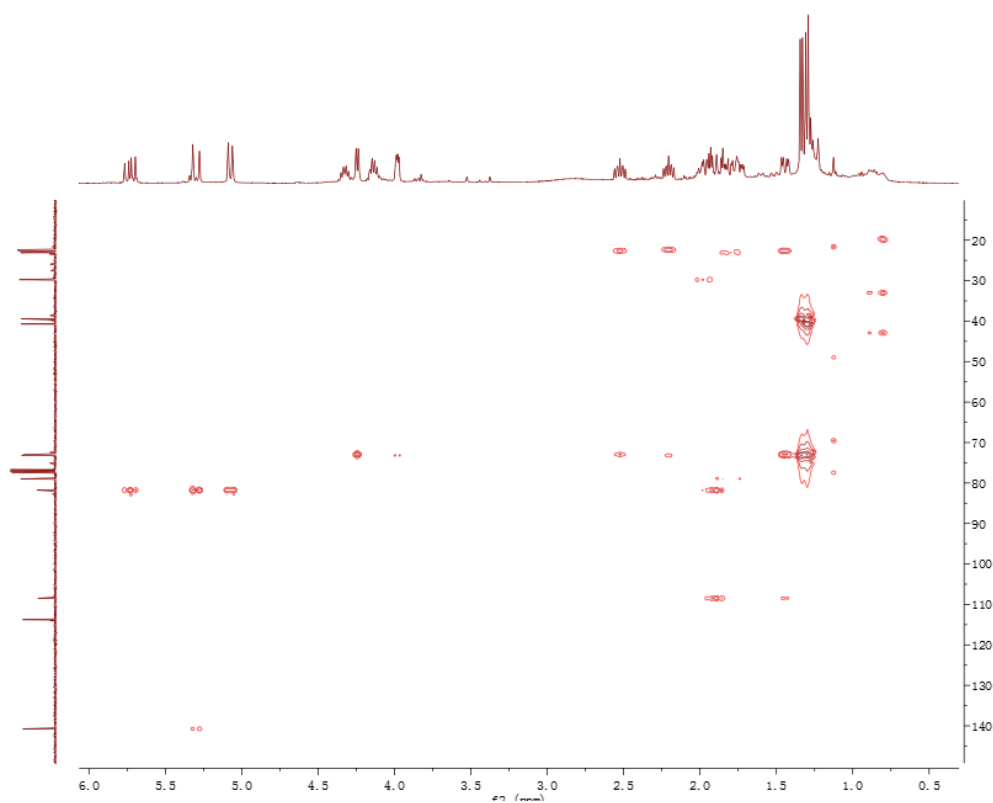

**Figure. S41** HMBC spectrum of compound **14**.

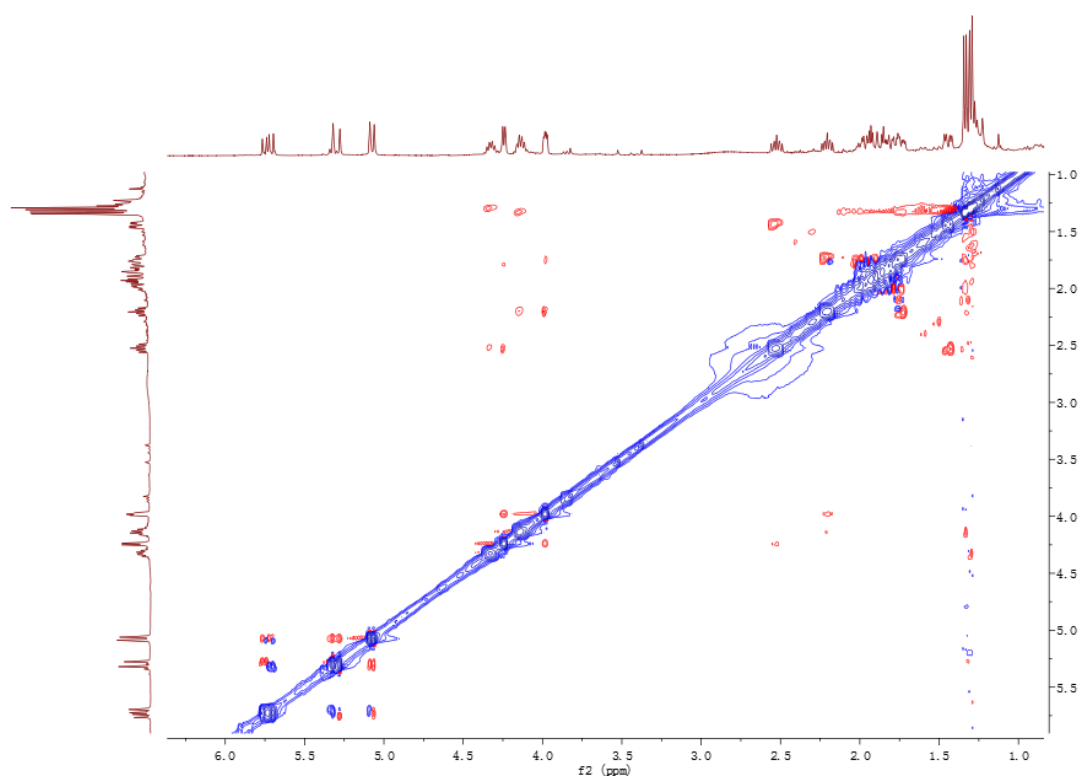

**Figure. S42** NOESY spectrum of compound **14**.

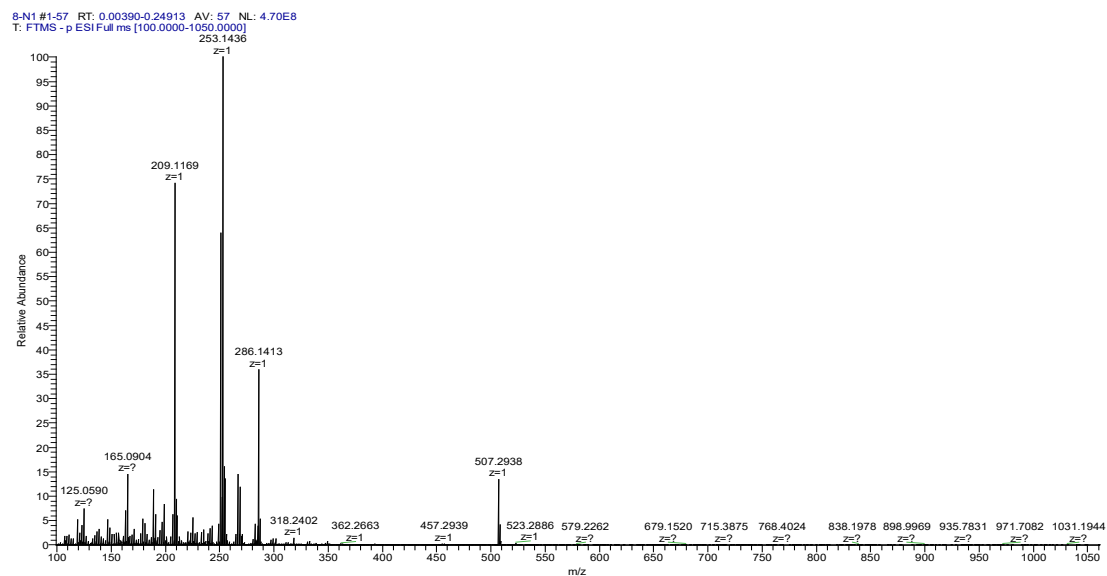

**Figure. S43** HRESIMS spectrum of compound **14**.

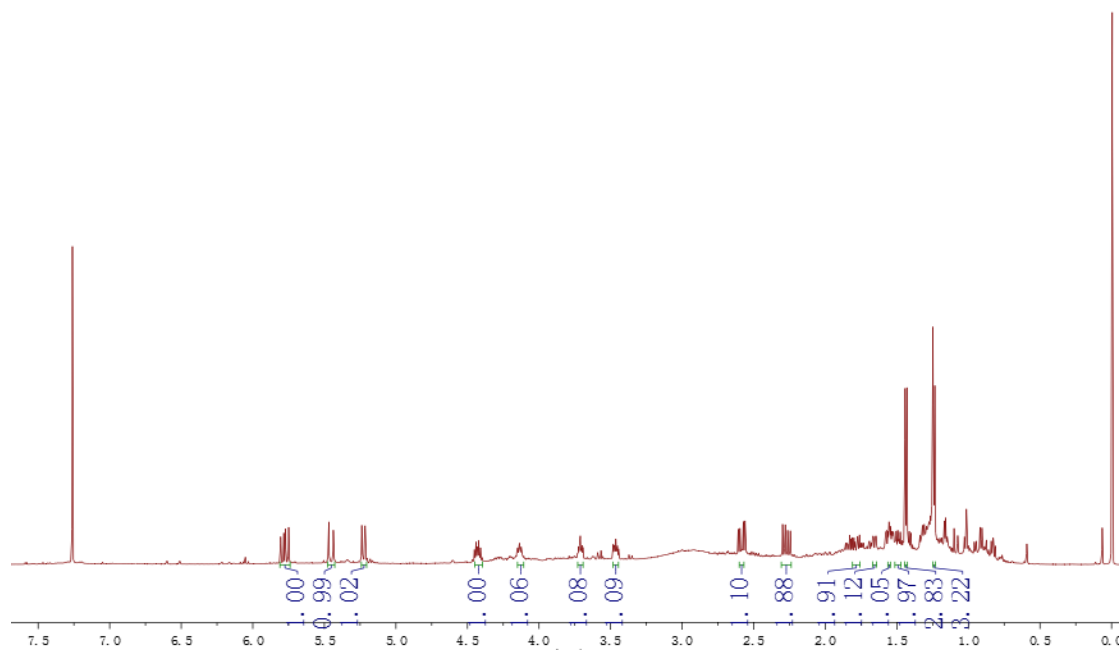

**Figure. S44**  $^1\text{H}$  NMR spectrum of compound **15** (500 MHz,  $\text{DMSO}-d_6$ ).

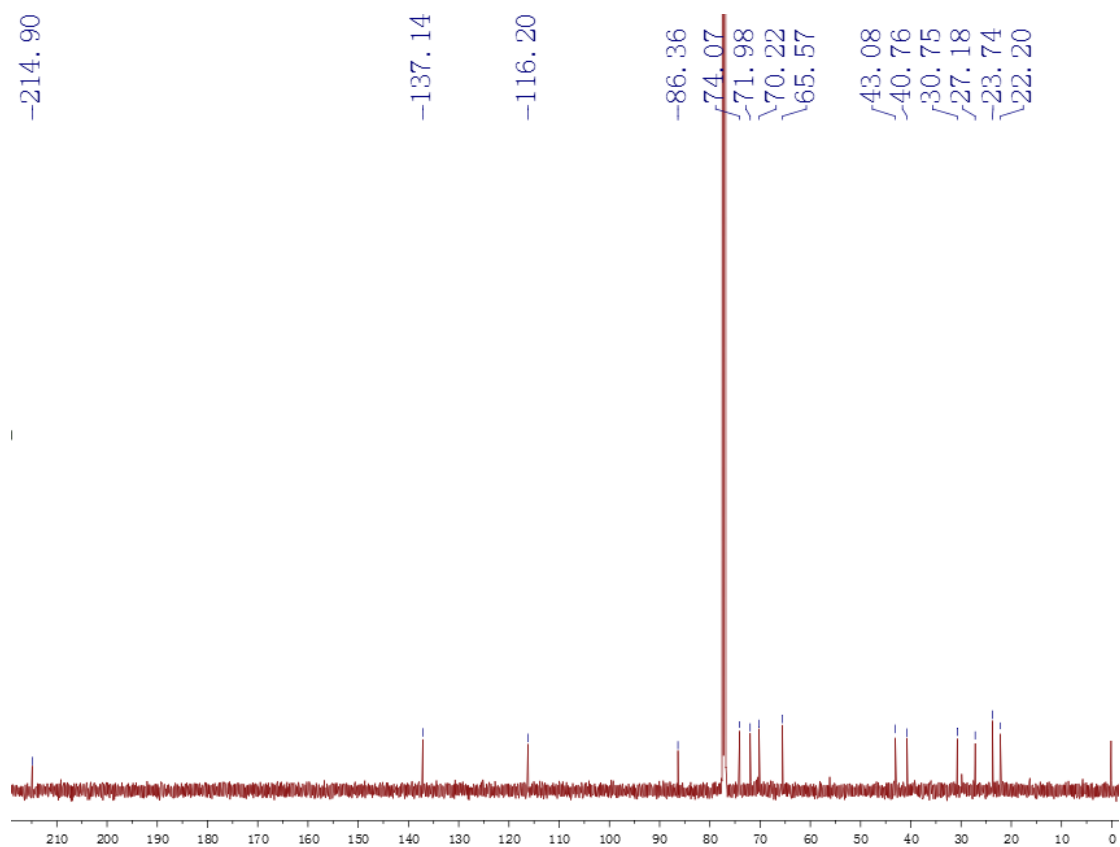

**Figure. S45** <sup>13</sup>C NMR spectrum of compound **15** (125 MHz, DMSO-*d*<sub>6</sub>).

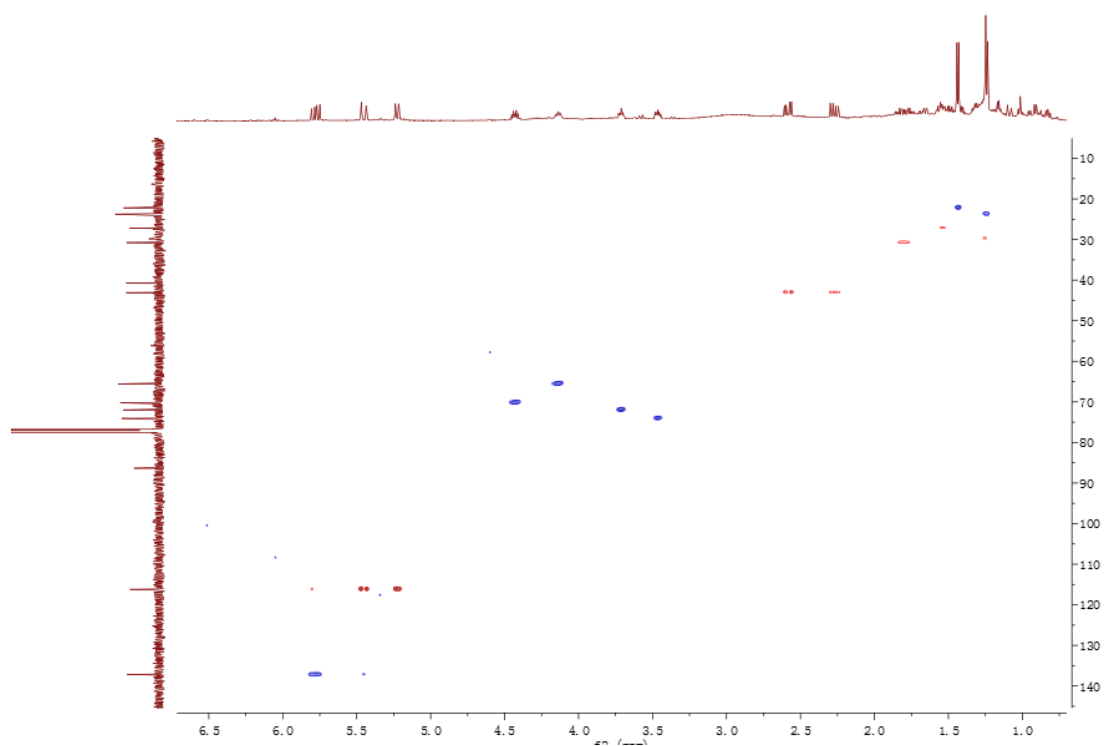

**Figure. S46** HSQC spectrum of compound **15**.

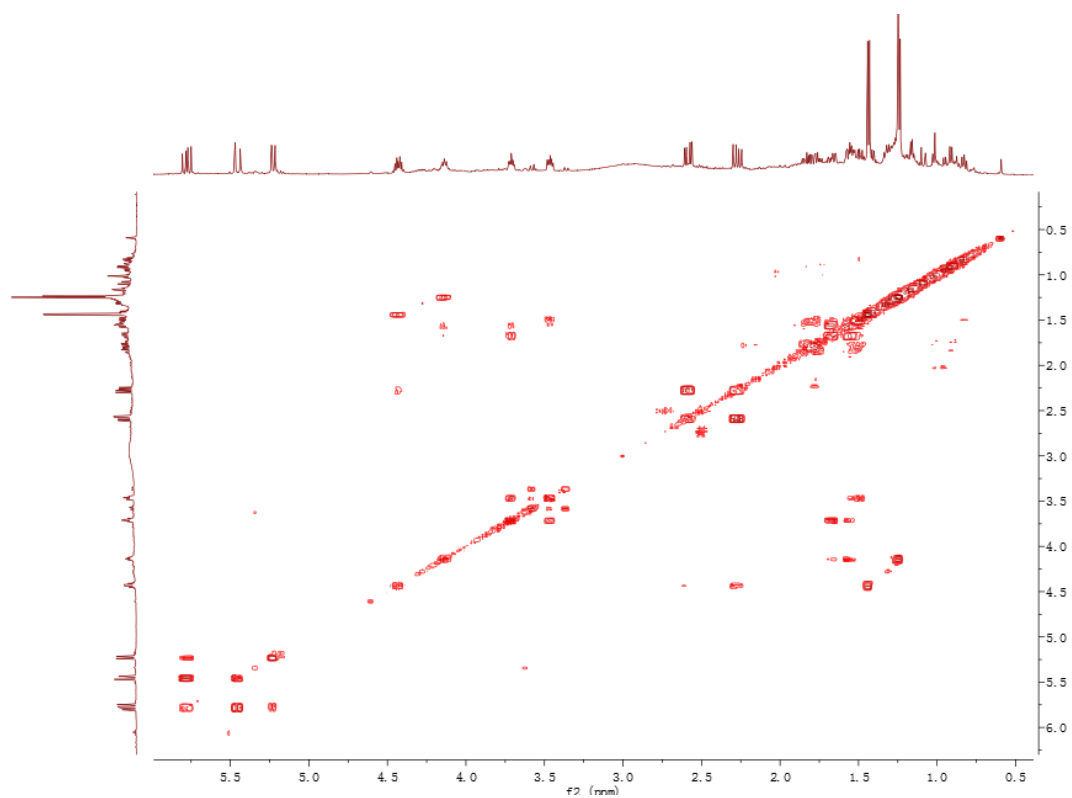

**Figure. S47**  $^1\text{H}$ - $^1\text{H}$  COSY spectrum of compound **15**.

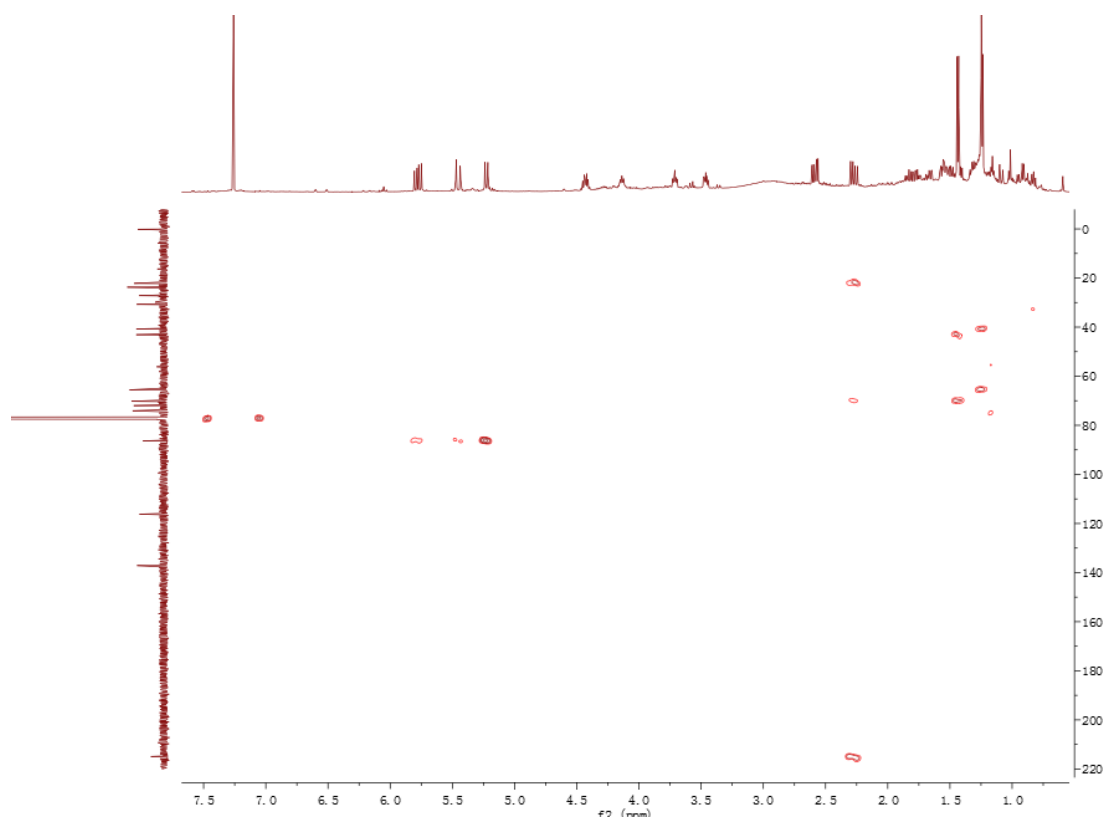

**Figure. S48** HMBC spectrum of compound **15**.

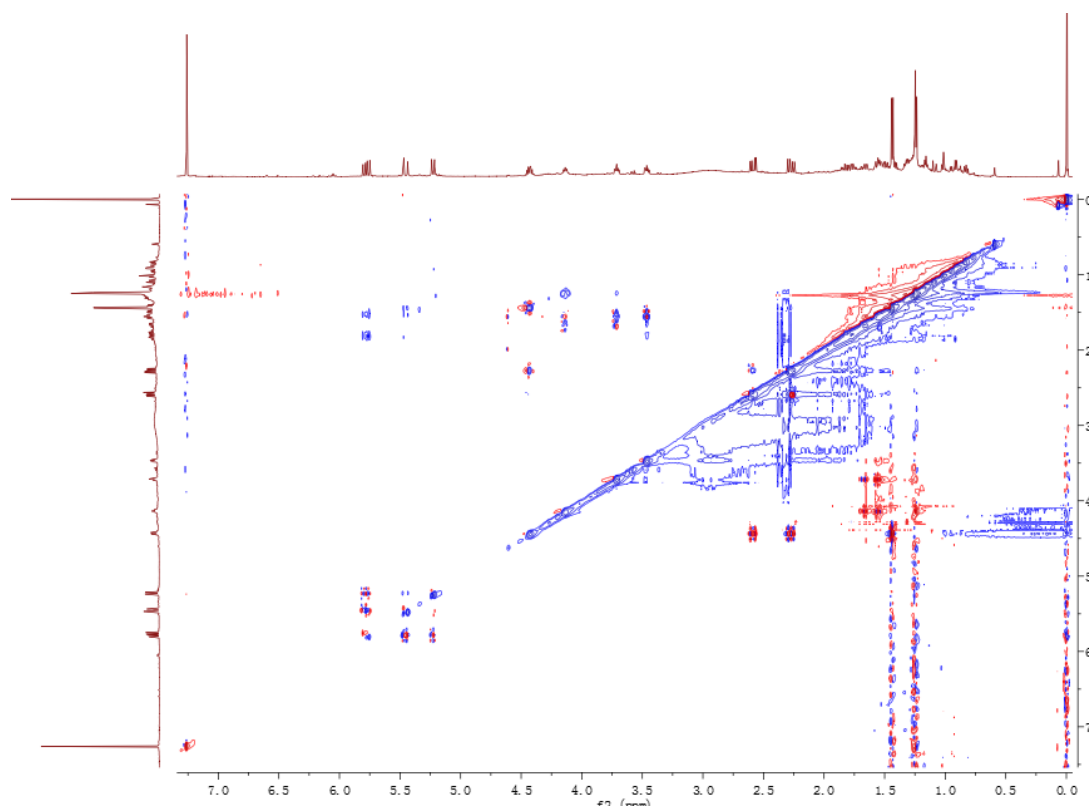

**Figure. S49** NOESY spectrum of compound **15**.

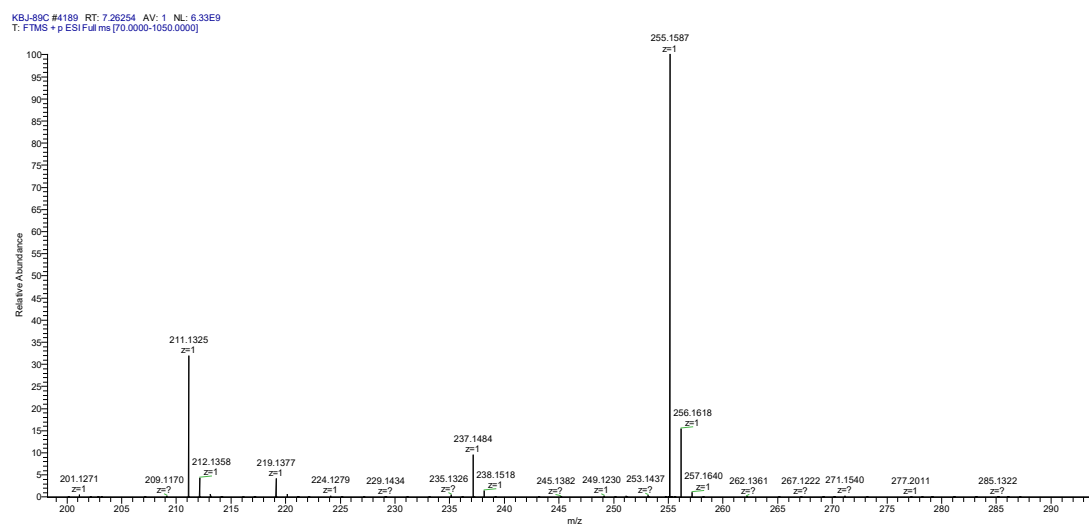

**Figure. S50** HRESIMS spectrum of compound **15**.

Table S1. The DP4+ evaluation of compound **14**.

|    | A          | B    | C            | D        | E            | F        | G               | H        |
|----|------------|------|--------------|----------|--------------|----------|-----------------|----------|
| 1  | Functional |      | Solvent?     |          | Basis Set    |          | Type of Data    |          |
| 2  | mPW1PW91   |      | PCM          |          | 6-311+G(d,p) |          | Unscaled Shifts |          |
| 3  |            |      |              |          |              |          |                 |          |
| 12 |            |      | DP4+         | 0.00%    | 100.00%      | -        | -               | -        |
| 14 | Nuclei     | sp2? | Experimental | Isomer 1 | Isomer 2     | Isomer 3 | Isomer 4        | Isomer 5 |
| 15 | C          |      | 73           | 72.5     | 74.8         |          |                 |          |
| 16 | C          |      | 40.7         | 40.8     | 39.1         |          |                 |          |
| 17 | C          |      | 72.9         | 80.5     | 73.0         |          |                 |          |
| 18 | C          |      | 81.8         | 78.2     | 83.9         |          |                 |          |
| 19 | C          |      | 23.1         | 28.9     | 24.5         |          |                 |          |
| 20 | C          |      | 29.8         | 31.5     | 29.5         |          |                 |          |
| 21 | C          |      | 108.5        | 102.6    | 107.8        |          |                 |          |
| 22 | C          |      | 79           | 77.1     | 80.3         |          |                 |          |
| 23 | C          |      | 39.4         | 40.0     | 41.1         |          |                 |          |
| 24 | C          |      | 73.2         | 73.9     | 73.8         |          |                 |          |
| 25 | C          |      | 22.4         | 21.7     | 20.2         |          |                 |          |
| 26 | C          | x    | 140.7        | 144.30   | 140.90       |          |                 |          |
| 27 | C          | x    | 113.8        | 111.70   | 113.70       |          |                 |          |
| 28 | C          |      | 22.6         | 20.70    | 21.50        |          |                 |          |
| 29 | H          |      | 4.33         | 3.94     | 4.18         |          |                 |          |
| 30 | H          |      | 2.52         | 2.53     | 2.31         |          |                 |          |
| 31 | H          |      | 1.44         | 2.13     | 1.49         |          |                 |          |
| 32 | H          |      | 4.24         | 4.34     | 4.08         |          |                 |          |
| 33 | H          |      | 1.85         | 1.89     | 1.86         |          |                 |          |
| 34 | H          |      | 1.94         | 1.69     | 1.71         |          |                 |          |
| 35 | H          |      | 3.98         | 3.87     | 3.98         |          |                 |          |
| 36 | H          |      | 2.21         | 2.19     | 2.53         |          |                 |          |
| 37 | H          |      | 1.34         | 1.65     | 1.36         |          |                 |          |
| 38 | H          |      | 4.14         | 4.02     | 4.08         |          |                 |          |
| 39 | H          |      | 1.34         | 1.28     | 1.29         |          |                 |          |
| 40 | H          | x    | 5.73         | 6.33     | 5.96         |          |                 |          |
| 41 | H          | x    | 5.3          | 5.39     | 5.38         |          |                 |          |
| 42 | H          | x    | 5.07         | 5.2      | 5.19         |          |                 |          |
| 43 | H          |      | 1.3          | 1.25     | 1.25         |          |                 |          |

|    | A                | B | C        | D        | E            | F        | G               | H        |
|----|------------------|---|----------|----------|--------------|----------|-----------------|----------|
| 1  | Functional       |   | Solvent? |          | Basis Set    |          | Type of Data    |          |
| 2  | mPW1PW91         |   | PCM      |          | 6-311+G(d,p) |          | Unscaled Shifts |          |
| 3  |                  |   |          |          |              |          |                 |          |
| 4  |                  |   | Isomer 1 | Isomer 2 | Isomer 3     | Isomer 4 | Isomer 5        | Isomer 6 |
| 5  | sDP4+ (H data)   |   | 0.03%    | 99.97%   | —            | —        | —               | —        |
| 6  | sDP4+ (C data)   |   | 0.00%    | 100.00%  | —            | —        | —               | —        |
| 7  | sDP4+ (all data) |   | 0.00%    | 100.00%  | —            | —        | —               | —        |
| 8  | uDP4+ (H data)   |   | 0.32%    | 99.68%   | —            | —        | —               | —        |
| 9  | uDP4+ (C data)   |   | 0.01%    | 99.99%   | —            | —        | —               | —        |
| 10 | uDP4+ (all data) |   | 0.00%    | 100.00%  | —            | —        | —               | —        |
| 11 | DP4+ (H data)    |   | 0.00%    | 100.00%  | —            | —        | —               | —        |
| 12 | DP4+ (C data)    |   | 0.00%    | 100.00%  | —            | —        | —               | —        |
| 13 | DP4+ (all data)  |   | 0.00%    | 100.00%  | —            | —        | —               | —        |

Table S2. The binding energy of compounds **1-13** with numerous inflammatory targets (kcal/mol).

| PDB ID | protein name | compounds |      |      |      |       |       |       |       |       |       |       |       |
|--------|--------------|-----------|------|------|------|-------|-------|-------|-------|-------|-------|-------|-------|
|        |              | 1         | 2    | 3    | 4    | 5     | 6     | 7     | 8     | 9     | 10    | 11    | 12    |
| 2ORP   | iNOS         | -11.1     | -7.7 | -7.8 | -9.2 | -10.8 | -11.0 | -7.3  | -11.0 | -10.6 | -9.5  | -9.0  | -10.9 |
| 1HT8   | COX-1        | -10.5     | -6.6 | -8.6 | -3.5 | -6.3  | -7.6  | -6.7  | -10.7 | -7.3  | -5.5  | -6.6  | -9.3  |
| 5F19   | COX-2        | -10.1     | -6.9 | -8.3 | -2.7 | -8.3  | -11.1 | -11.2 | -11.7 | -11.3 | -11.3 | -10.8 | -12.3 |
| 6S8T   | ICAM         | -8.3      | -7.1 | -9.6 | -6.0 | -7.3  | -10.8 | -9.3  | -7.2  | -8.5  | -8.2  | -8.5  | -9.7  |
| 4HSA   | IL-17        | -8.5      | -8.6 | -7.6 | -8.8 | -8.1  | -11.0 | -8.1  | -9.5  | -10.0 | -8.9  | -10.5 | -0.66 |
| 3QT2   | IL-5         | -10.3     | -7.6 | -8.9 | -8.4 | -7.7  | -8.6  | -8.2  | -6.8  | -7.7  | -8.1  | -9.4  | -8.2  |
| 6N7A   | JAK1         | -7.2      | -9.2 | -8.9 | -6.7 | -8.7  | -9.2  | -9.5  | -9.5  | -10.9 | -8.7  | -7.0  | -8.4  |

|      |               |      |      |      |      |      |       |      |       |      |      |      |      |      |
|------|---------------|------|------|------|------|------|-------|------|-------|------|------|------|------|------|
| 6X8E | JAK2          | -8.0 | -7.1 | -7.3 | -7.6 | -7.1 | -9.7  | -9.9 | -10.8 | -9.6 | -7.2 | -8.3 | -8.8 | -6.8 |
| 4RMH | SIRT2         | -8.1 | -6.5 | -8.5 | -5.7 | -8.0 | -6.1  | -7.3 | -9.2  | -8.8 | -7.6 | -9.3 | -5.3 | -9.9 |
| 2AZ5 | TNF- $\alpha$ | -8.3 | -6.9 | -8.4 | -7.2 | -7.1 | -10.2 | -6.4 | -9.2  | -8.8 | -7.0 | -9.6 | -7.8 | -7.5 |
